# Supplementary material for: Vysotskite structured photoactive palladium sulphide thin films from dithiocarbamate derivatives
Source: Royal Society of Chemistry journal article supplement (doi:10.1039/c4nj00564c), 2014-01-01
Supplement: c4nj00564c1.pdf [file c4nj00564c1.pdf]

## Electronic Supplementary Information

### **Title: Vysotskite structured photoactive palladium sulphide thin films from dithiocarbamate derivatives**

**Authors: Muhammad Ali Ehsan,<sup>a</sup> Huang Nay Ming,<sup>b</sup> Vickie McKee,<sup>c</sup> Thalge Anton Nirmal Peiris,<sup>c</sup> Upul Wijayantha-Kahagala-Gamage<sup>c</sup> Zainudin Arifin<sup>a</sup> and Muhammad Mazhar,<sup>\*a</sup>**

**Published in: New Journal of Chemistry**

| <b>List of Information</b>                                | <b>Page No.</b> |
|-----------------------------------------------------------|-----------------|
| Microanalysis of complexes (1)-(4)                        | 2               |
| <sup>1</sup> H-NMR spectra of complexes (1)-(4)           | 3-7             |
| TGA plots of complexes (1)-(4)                            | 8-9             |
| EDX spectra of PdS films deposited from complexes (1)-(4) | 10-11           |
| Optical bandgap energies of PdS films                     | 12-13           |
| X-ray Crystallography of complexes (1)-(4)                | 13-35           |

## Micro Analysis

Precursor [Pd(S<sub>2</sub>CNBz<sub>2</sub>)<sub>2</sub>]•Py(1)

| Run | Run # | Weight | Created on       | Carbon | Hydrogen | Nitrogen | Messages |
|-----|-------|--------|------------------|--------|----------|----------|----------|
| P1  | 77    | 1.705  | 2013-3-6 4:22 PM | 57.911 | 4.331    | 5.525    |          |

Precursor [Pd(S<sub>2</sub>CNCy<sub>2</sub>)<sub>2</sub>]•Py(2)

| Run Details |       |        |                    | Results |          |          | Messages |
|-------------|-------|--------|--------------------|---------|----------|----------|----------|
| Run         | Run # | Weight | Created on         | Carbon  | Hydrogen | Nitrogen | Messages |
| P2          | 22    | 1.554  | 2013-6-19 12:27 PM | 52.868  | 7.317    | 5.84     |          |

Precursor [Pd(S<sub>2</sub>CN<sup>n</sup>Hex<sub>2</sub>)<sub>2</sub>] (3)

| Run Details |       |        |                    | Results |          |          | Messages |
|-------------|-------|--------|--------------------|---------|----------|----------|----------|
| Run         | Run # | Weight | Created on         | Carbon  | Hydrogen | Nitrogen | Messages |
| P3          | 77    | 1.611  | 2013-5-30 11:58 AM | 49.797  | 8.101    | 4.519    |          |

Precursor [Pd(S<sub>2</sub>CNMeCy)<sub>2</sub>] (4)

| Run Details |       |        |                   | Results |          |          | Messages |
|-------------|-------|--------|-------------------|---------|----------|----------|----------|
| Run         | Run # | Weight | Created on        | Carbon  | Hydrogen | Nitrogen | Messages |
| P4          | 15    | 1.586  | 2013-4-4 10:36 AM | 40.172  | 5.895    | 5.939    |          |

H-NMR of  $[Pd(S_2CNBz_2)_2] \cdot py$  (1) a

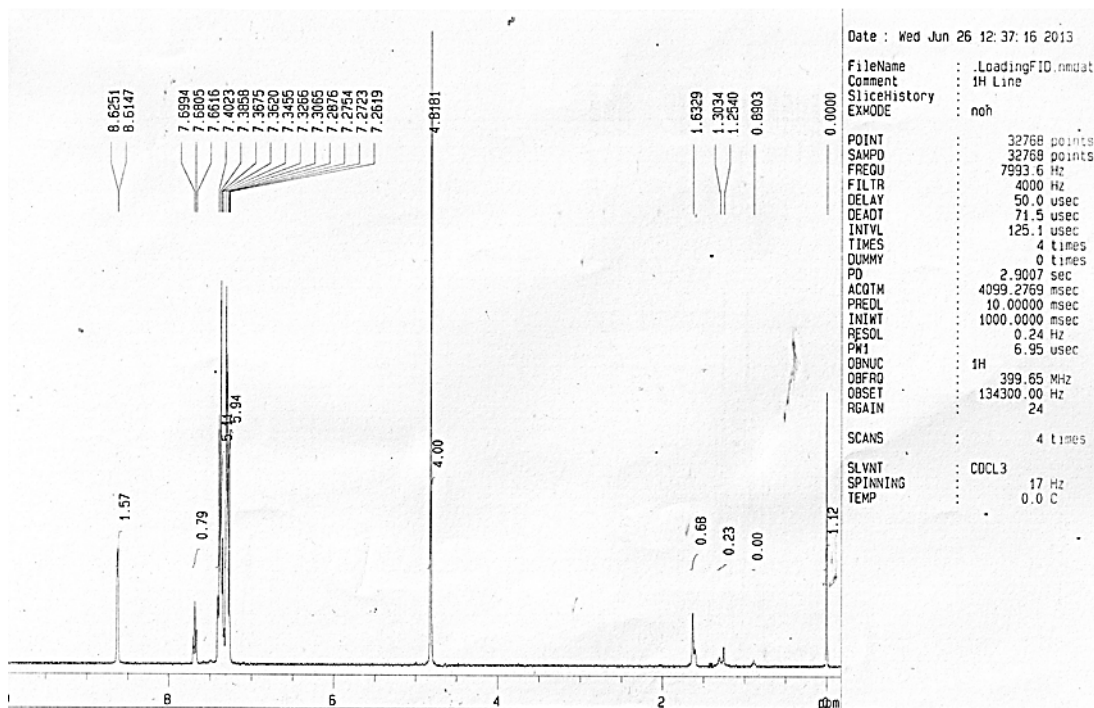

SI.Fig. 1a:  $^1H$ -NMR of Precursor  $[Pd(S_2CNBz_2)_2] \cdot Py(1)$ .

H-NMR of  $[Pd(S_2CNBz_2)_2] \cdot py$  (1) b

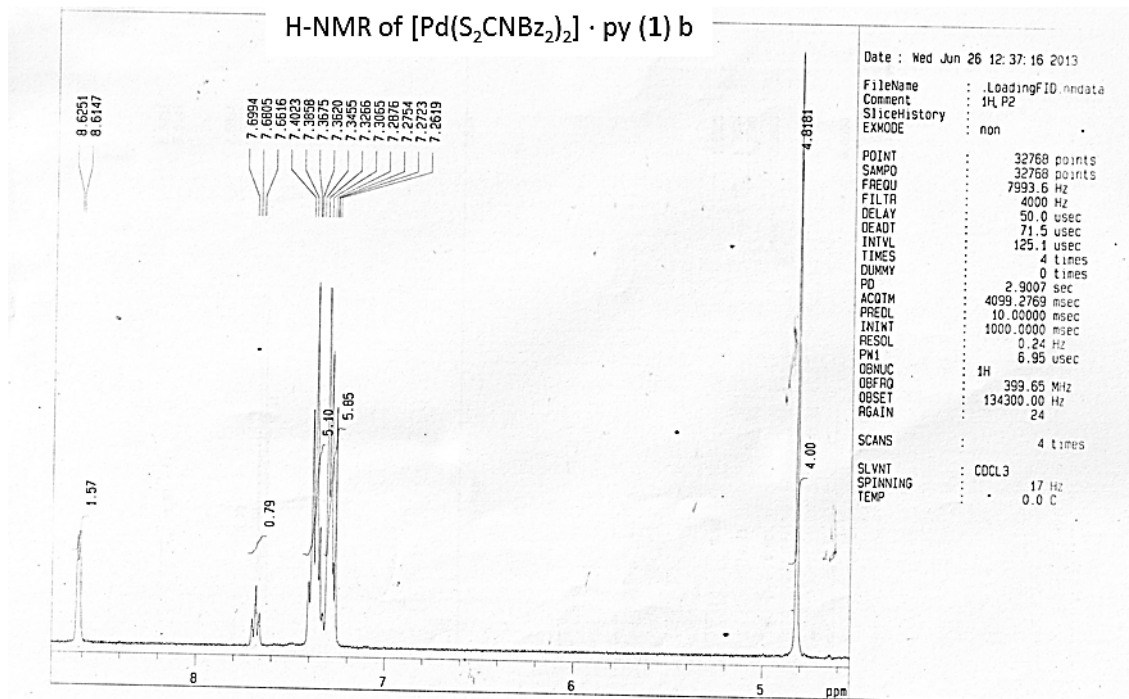

SI.Fig. 1b:  $^1H$ -NMR of Precursor  $[Pd(S_2CNBz_2)_2] \cdot Py(1)$

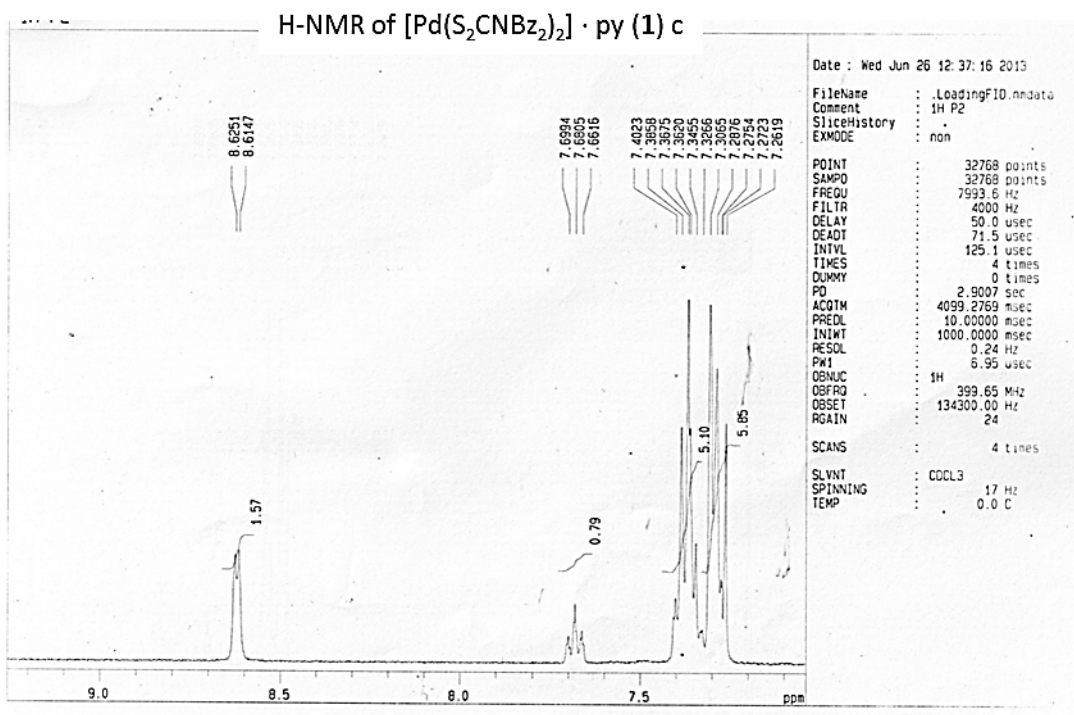

SI.Fig. 1c:  $^1\text{H-NMR}$  of Precursor  $[\text{Pd}(\text{S}_2\text{CNBz}_2)_2] \cdot \text{Py}$  (1)

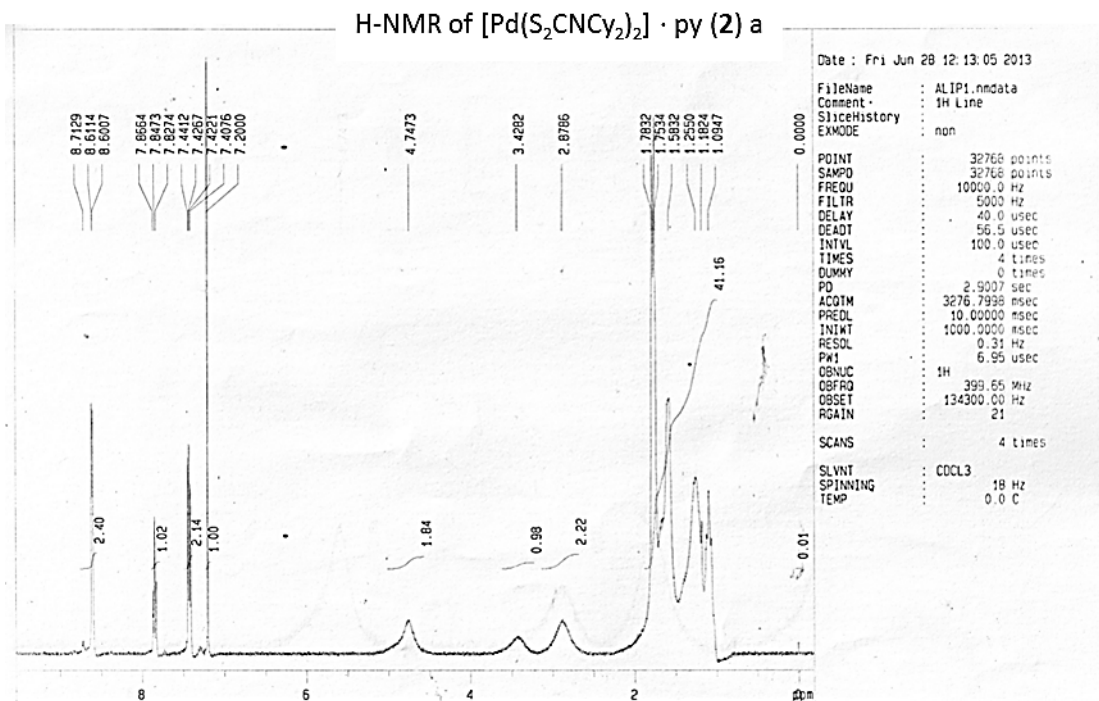

SI.Fig. 2a:  $^1\text{H-NMR}$  of Precursor  $[\text{Pd}(\text{S}_2\text{CNCy}_2)_2] \cdot \text{Py}$  (2)

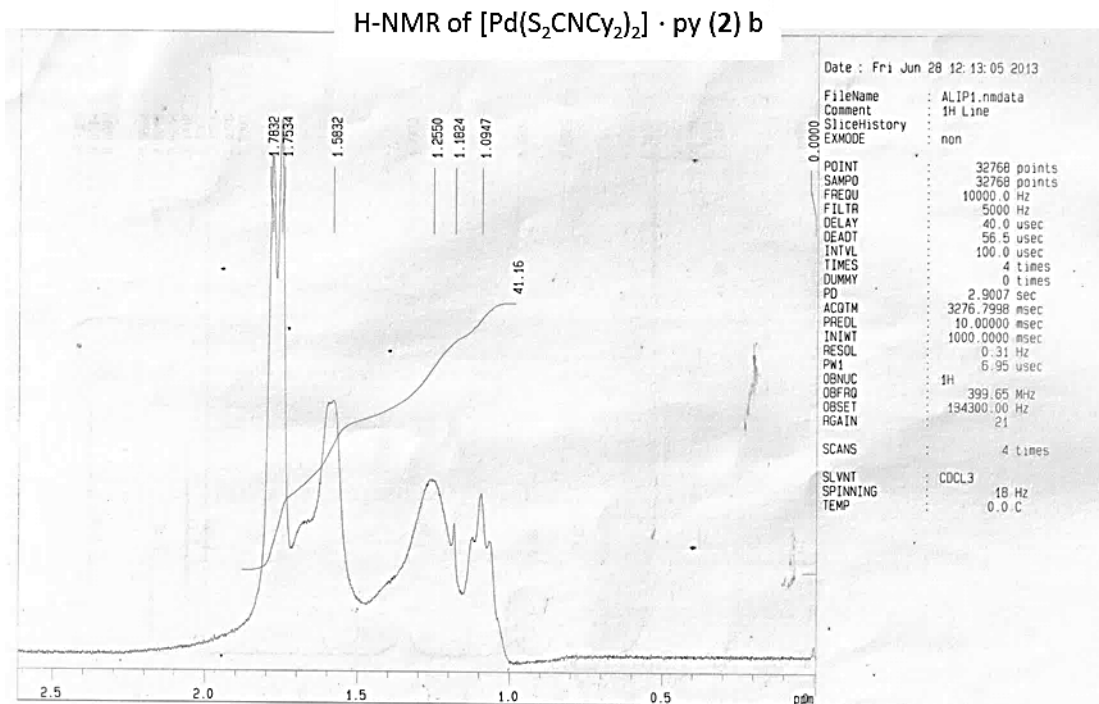

SI.Fig. 2b:  $^1\text{H-NMR}$  of Precursor  $[\text{Pd}(\text{S}_2\text{CNCy}_2)_2] \cdot \text{Py}(2)$

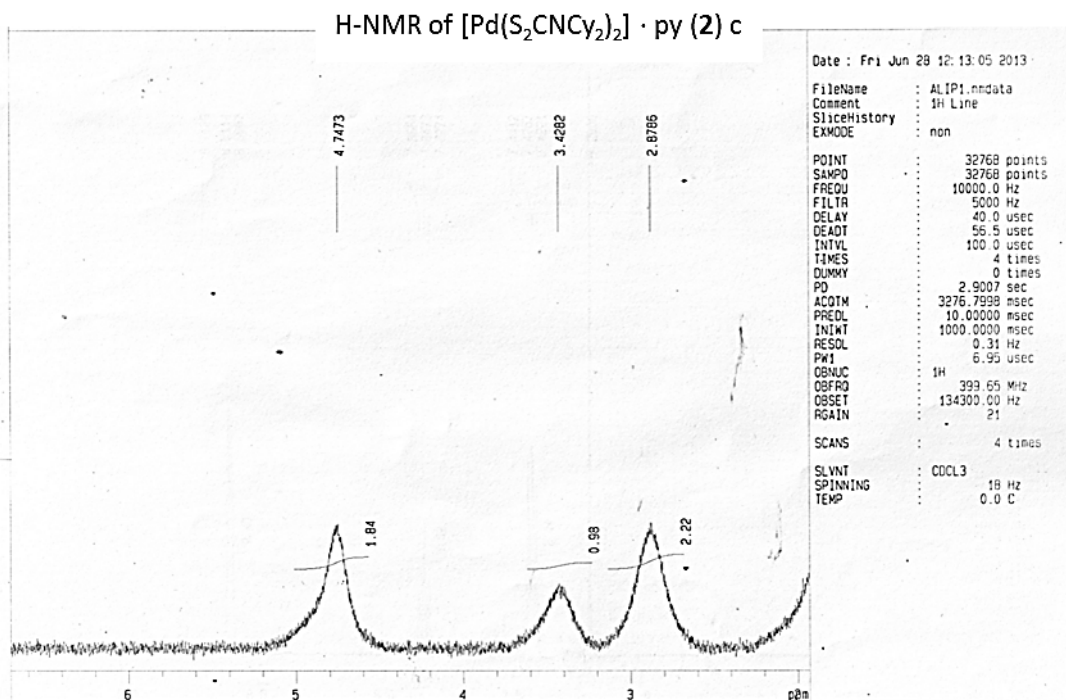

SI.Fig. 2c:  $^1\text{H-NMR}$  of Precursor  $[\text{Pd}(\text{S}_2\text{CNCy}_2)_2] \cdot \text{Py}(2)$

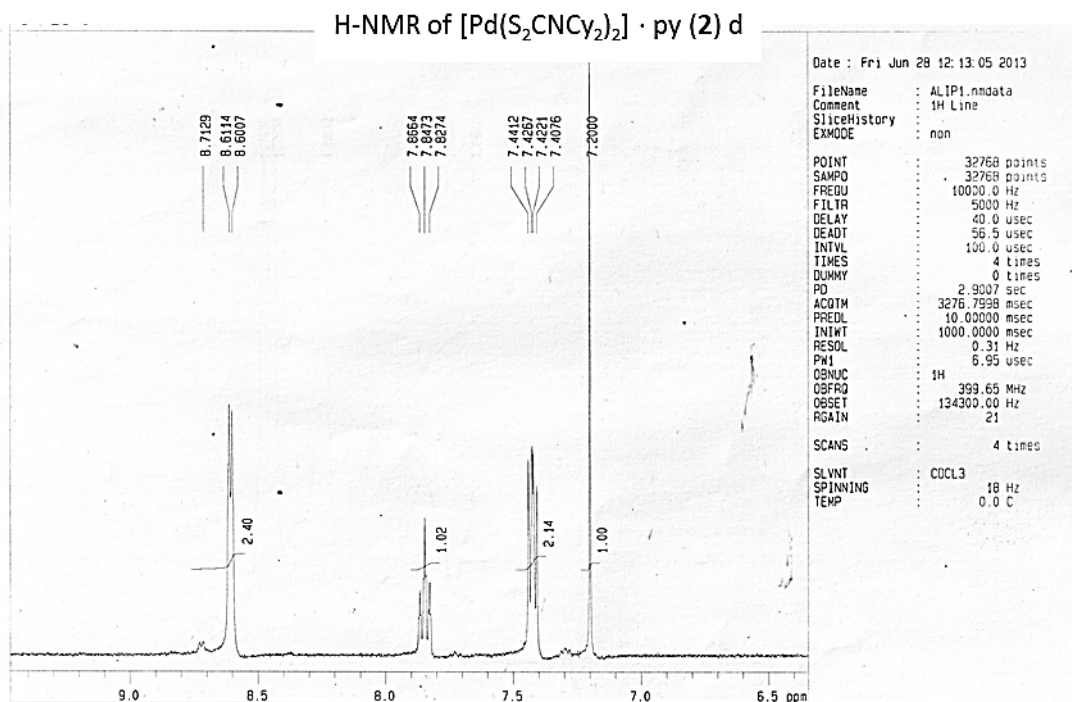

SI.Fig. 2d:  $^1\text{H-NMR}$  of Precursor  $[\text{Pd}(\text{S}_2\text{CNCy}_2)_2] \cdot \text{Py}(2)$

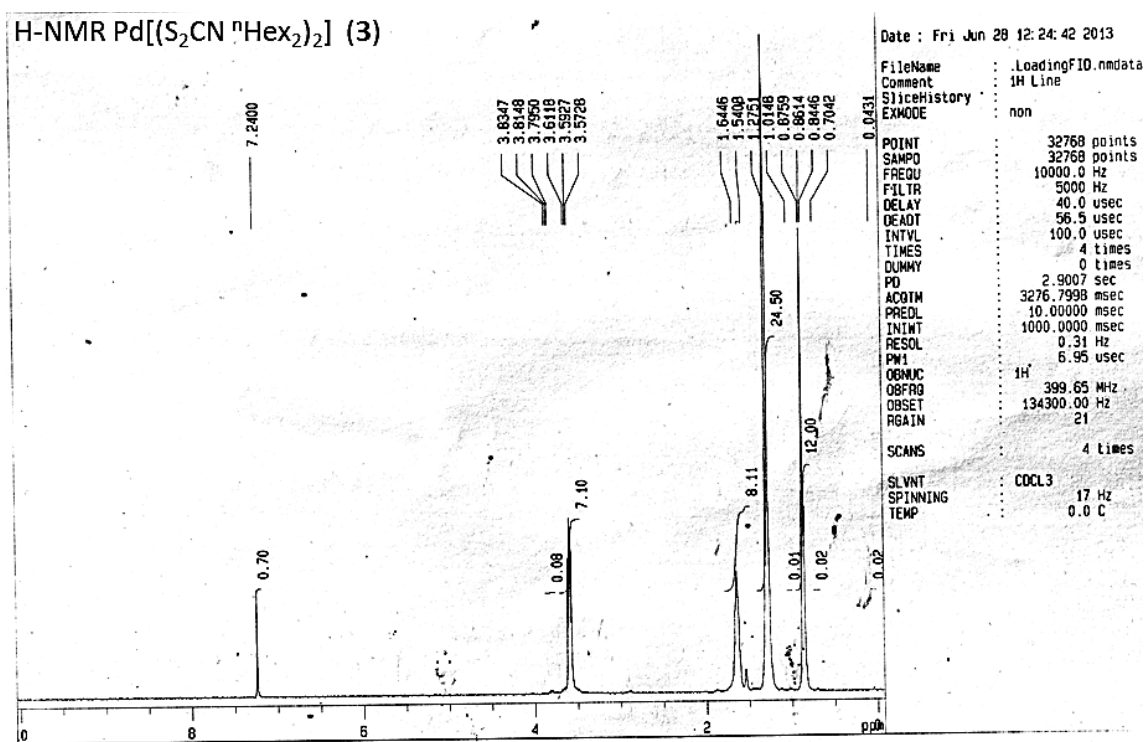

S.Fig. 3:  $^1\text{H-NMR}$  of Precursor  $[\text{Pd}(\text{S}_2\text{CN}^n\text{Hex}_2)_2] (3)$

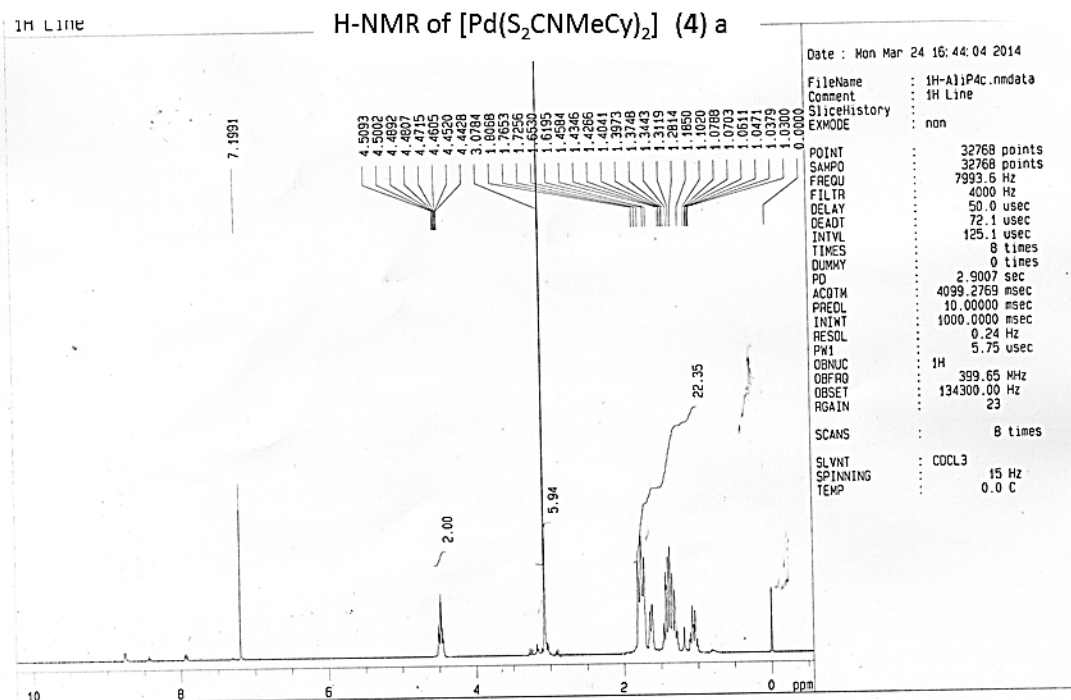

SI.Fig. 4: <sup>1</sup>H-NMR of Precursor [Pd(S<sub>2</sub>CNMeCy)<sub>2</sub>] (4)

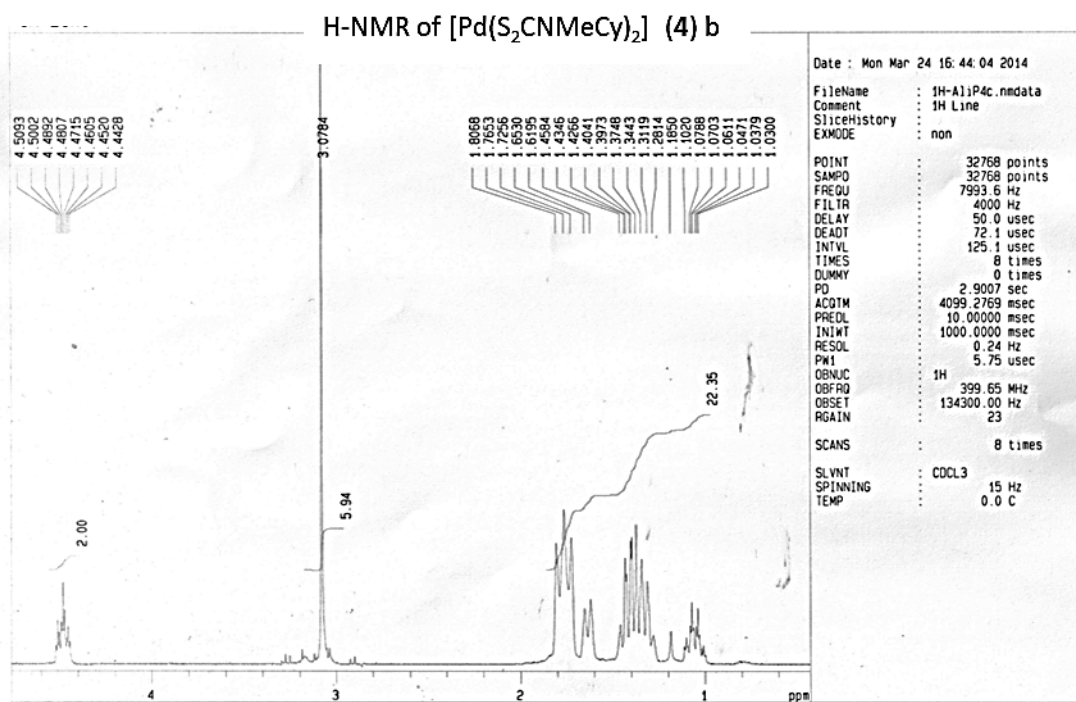

SI.Fig. 4: <sup>1</sup>H-NMR of Precursor [Pd(S<sub>2</sub>CNMeCy)<sub>2</sub>] (5)

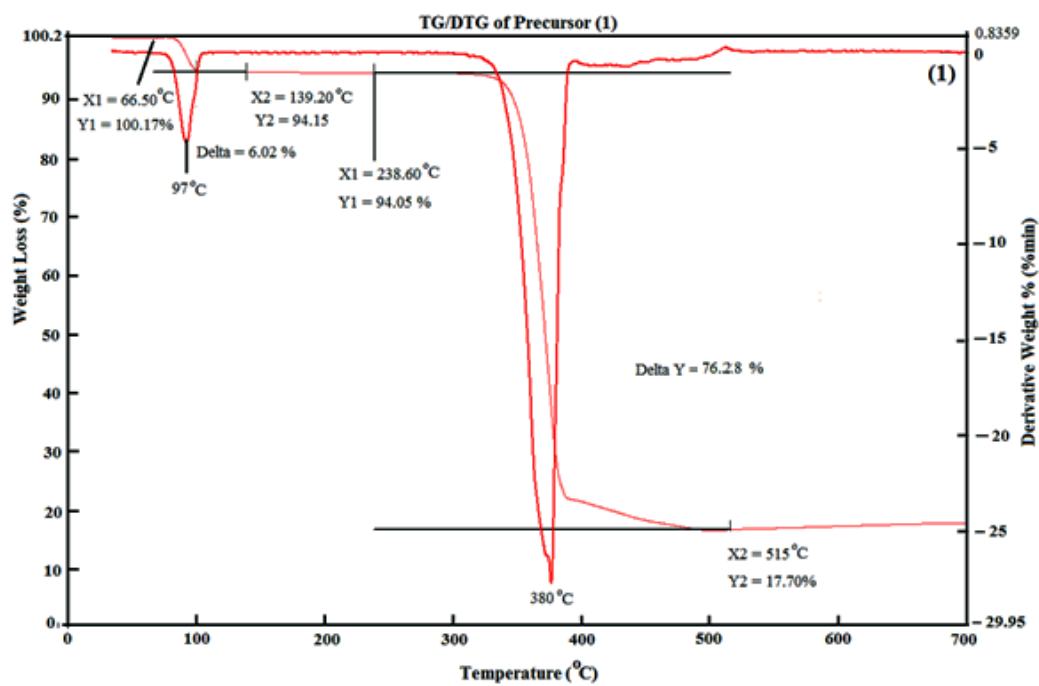

SI. Fig. 5a: TG/DTG curves presenting losses in weight against temperature for precursor  $[\text{Pd}(\text{S}_2\text{CNBz}_2)_2] \cdot \text{py}$  (1)

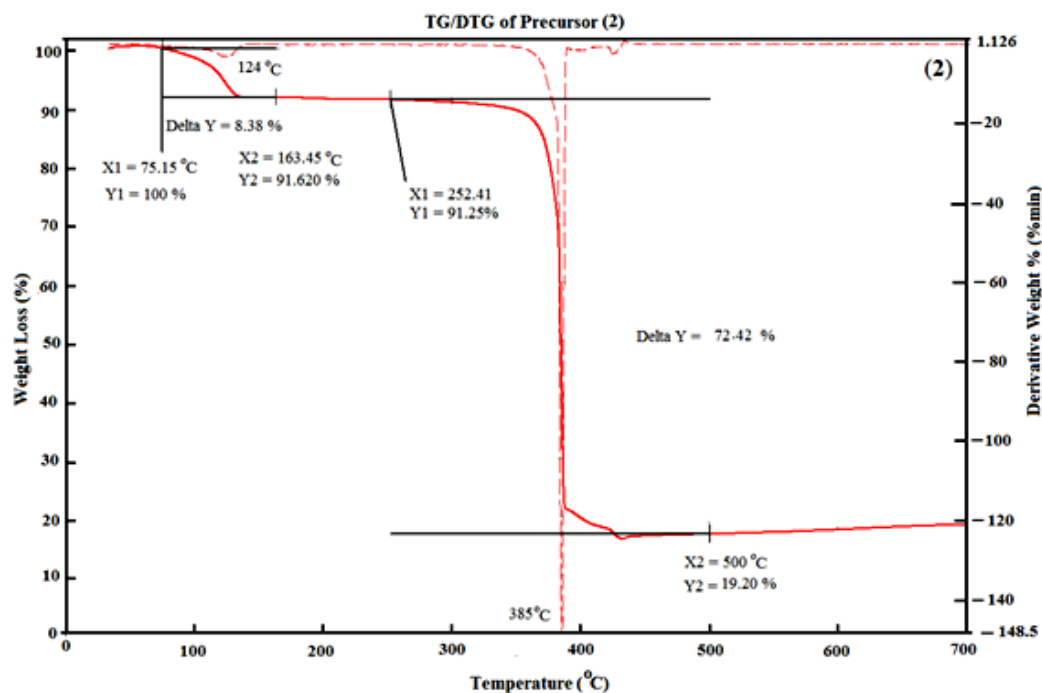

SI. Fig. 5b: TG/DTG curves presenting losses in weight against temperature for precursor  $[\text{Pd}(\text{S}_2\text{CNCy}_2)_2] \cdot \text{py}$  (2).



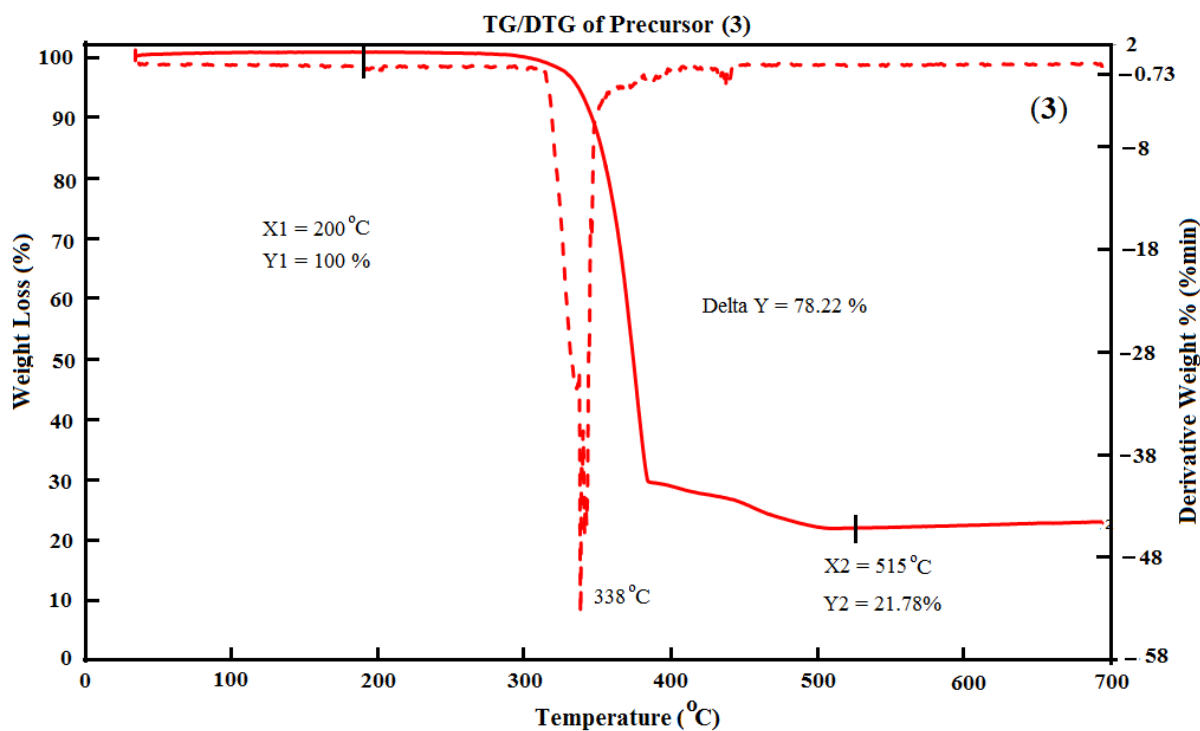

SI. Fig. 5c: TG/DTG curves presenting losses in weight against temperature for precursor  $[\text{Pd}(\text{S}_2\text{CN}^n\text{Hex}_2)_2]$  (3).

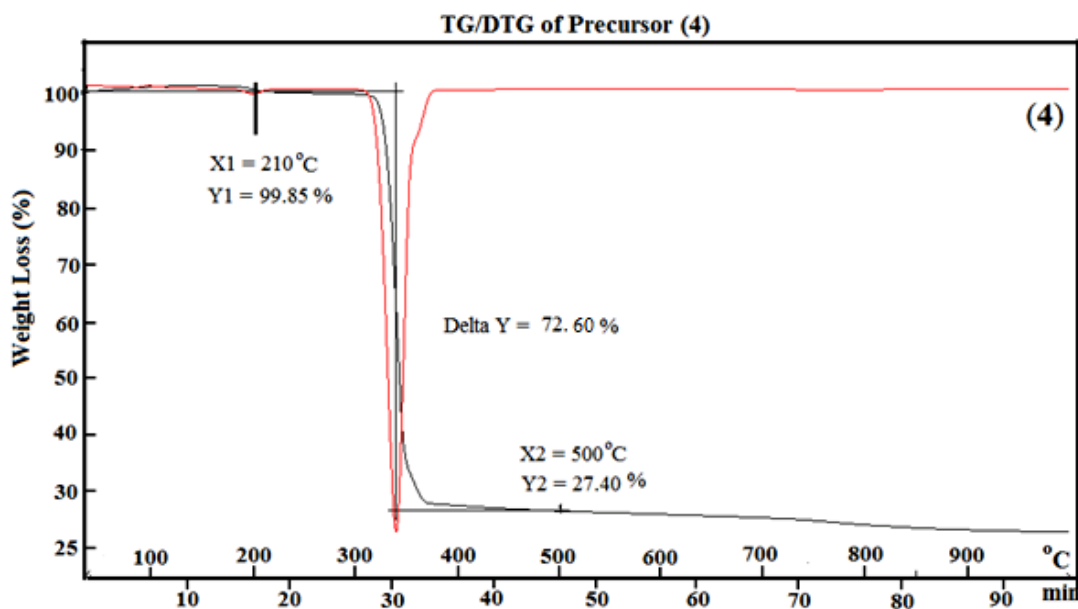

SI. Fig. 5d: TG/DTG curves presenting losses in weight against temperature for precursor  $[\text{Pd}(\text{S}_2\text{NCyMe}_2)_2]$  (4).

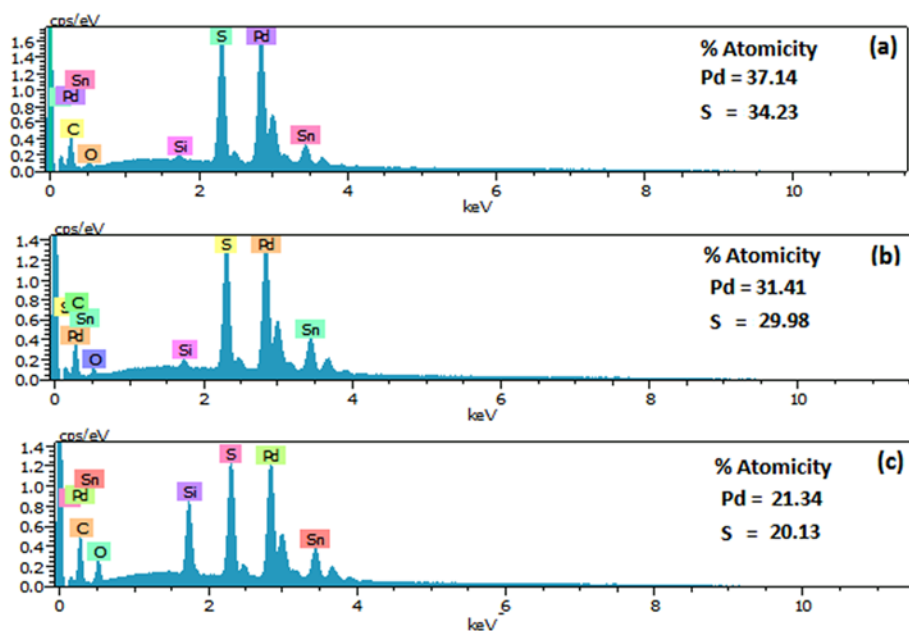

SI. Fig. 7a: EDX spectra of PdS thin films deposited using precursors  $[Pd(S_2CNBz_2)_2] \cdot py$  (1) at (a) 400 °C (b) 450 °C (c) 500 °C.

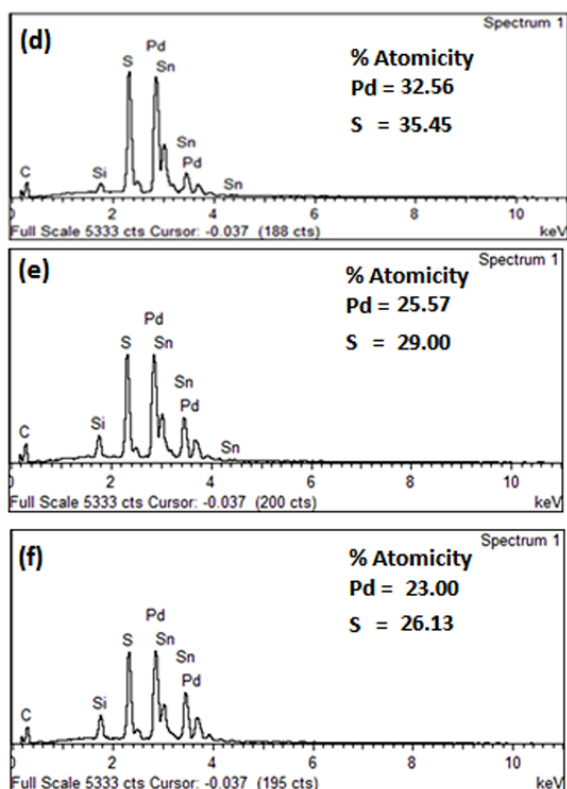

SI. Fig. 7b: EDX spectra of PdS thin films deposited using precursors  $[Pd(S_2CNCy_2)_2] \cdot py$  (2) at (d) 400 °C (e) 450 °C (f) 500 °C.

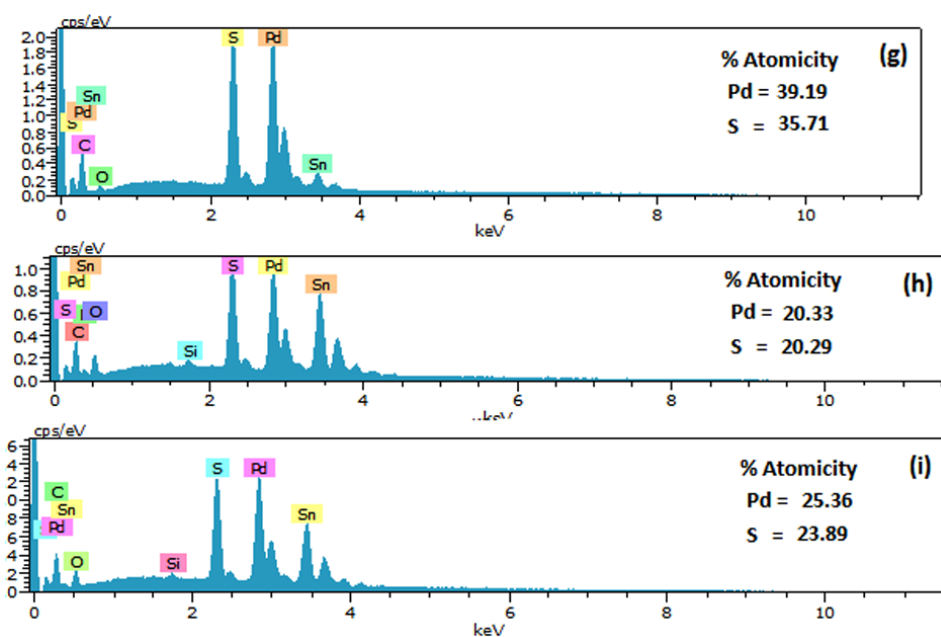

**SI. Fig. 7c:** EDX spectra of PdS thin films deposited using precursors  $[\text{Pd}(\text{S}_2\text{CN}^n\text{Hex}_2)_2]$  (**3**) at (g) 400 °C (h) 450 °C (i) 500 °C.

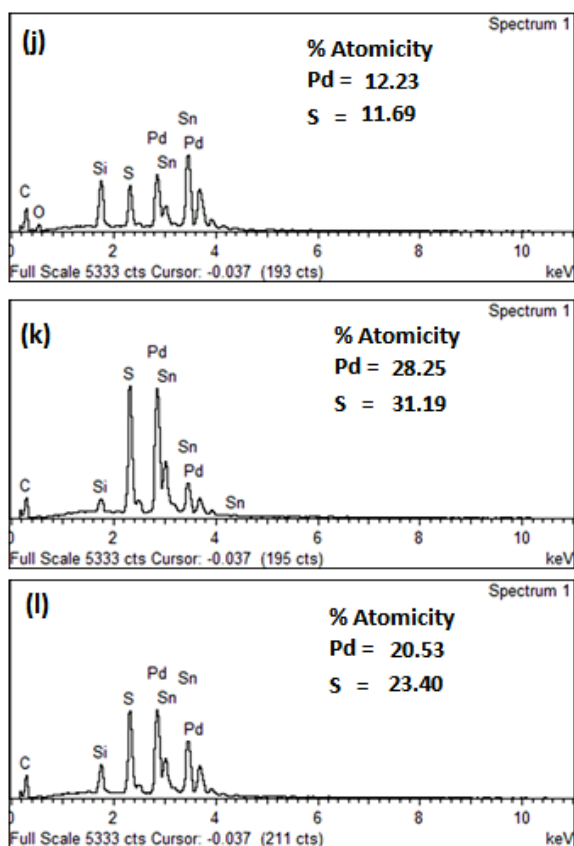

**SI. Fig. 7d:** EDX spectra of PdS thin films deposited using precursors  $[\text{Pd}(\text{S}_2\text{CNCyMe}_2)_2]$  (**4**) at (j) 400 °C (k) 450 °C (l) 500 °C.

**For Allowed Indirect Transition  $n = 2$**

Calculated Band gap ( $E_g$ ) = 0.75 eV

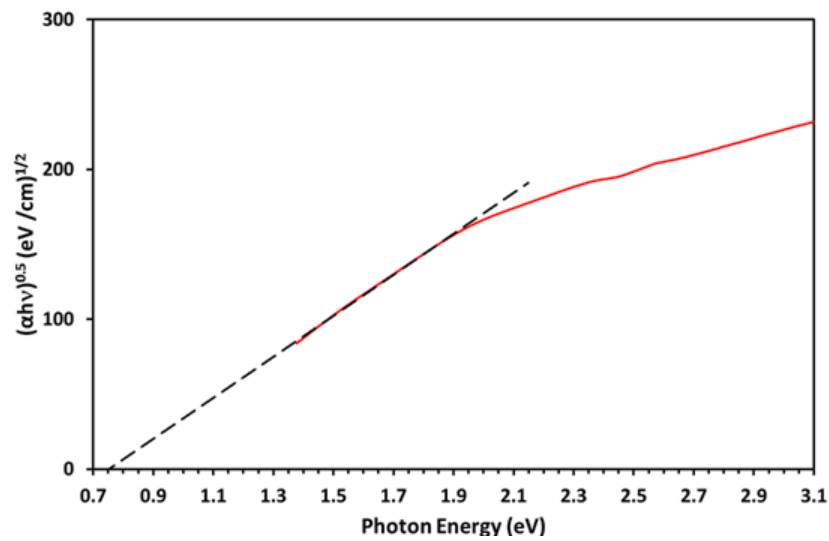

**SI. Fig. 8c:** Shows the allowed indirect ( $n = 2$ ) band gap of 0.75 eV for PdS films.

**For Forbidden Direct Transition ( $n = 3/2$ )**

Calculated Band gap ( $E_g$ ) = 0.95 eV

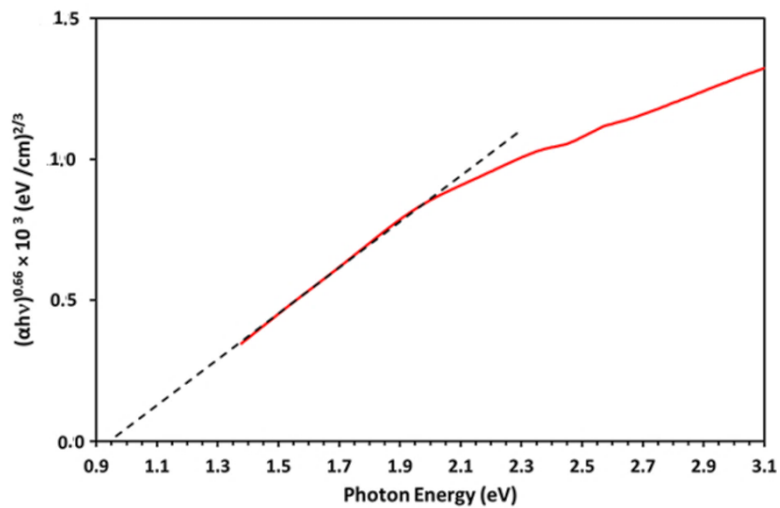

**SI. Fig. 8 d:** Shows the forbidden direct ( $n = 3/2$ ) band gap of 0.95 eV for PdS films.

### For Forbidden Indirect Transition ( n = 3 )

Calculated Band gap ( $E_g$ ) = 0.87 eV

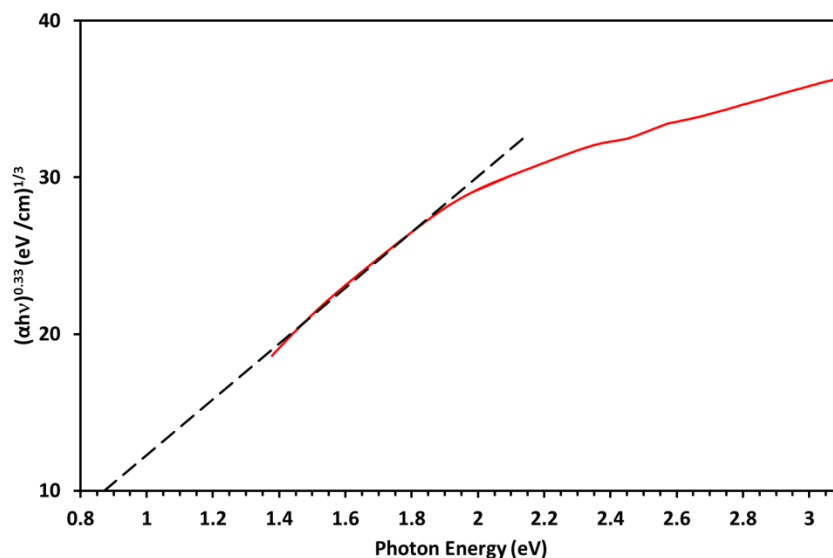

**S.Fig. 8 e:** Shows the indirect forbidden ( $n = 3$ ) band gap of 0.87 eV for PdS films.

## Supplementary material - crystallography

### Experimental

The data were collected at 150(2)K on a Bruker Apex II CCD diffractometer using  $\text{MoK}\alpha$  radiation ( $\lambda = 0.71073\text{\AA}$ ). The structure was solved by direct methods and refined on  $F^2$  using all the reflections<sup>1</sup>. All the non-hydrogen atoms were refined using anisotropic atomic displacement parameters and hydrogen atoms were inserted at calculated positions using a riding model. Crystal data, data collection and structure refinement details are summarized in Table 1.

### Computing details

Data collection: Bruker *APEX 2*; cell refinement: Bruker *SAINT*; data reduction: Bruker *SAINT*; program(s) used to solve structure: *SHELXS97* (Sheldrick, 2008); program(s) used to refine structure: *SHELXL2012*; molecular graphics: Bruker *SHELXTL* and *Mercury*; software used to prepare material for publication: *SHELX2012*.

### References

1. G.M. Sheldrick, Acta Cryst. 2008, A64, 112-122.

## Results and discussion

### Precursor $[\text{Pd}(\text{S}_2\text{CNBz}_2)_2]\cdot\text{py}$ (1)

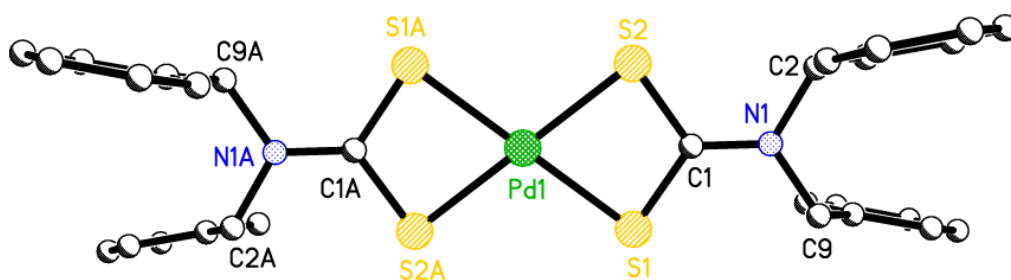

The Pd complex lies on a centre of symmetry and the pyridine solvate lies on a 2-fold axis.

There are no very significant intermolecular interactions.

The complex molecules pack with channels in the structure running parallel to *b* and these are occupied by the pyridine solvate molecules.

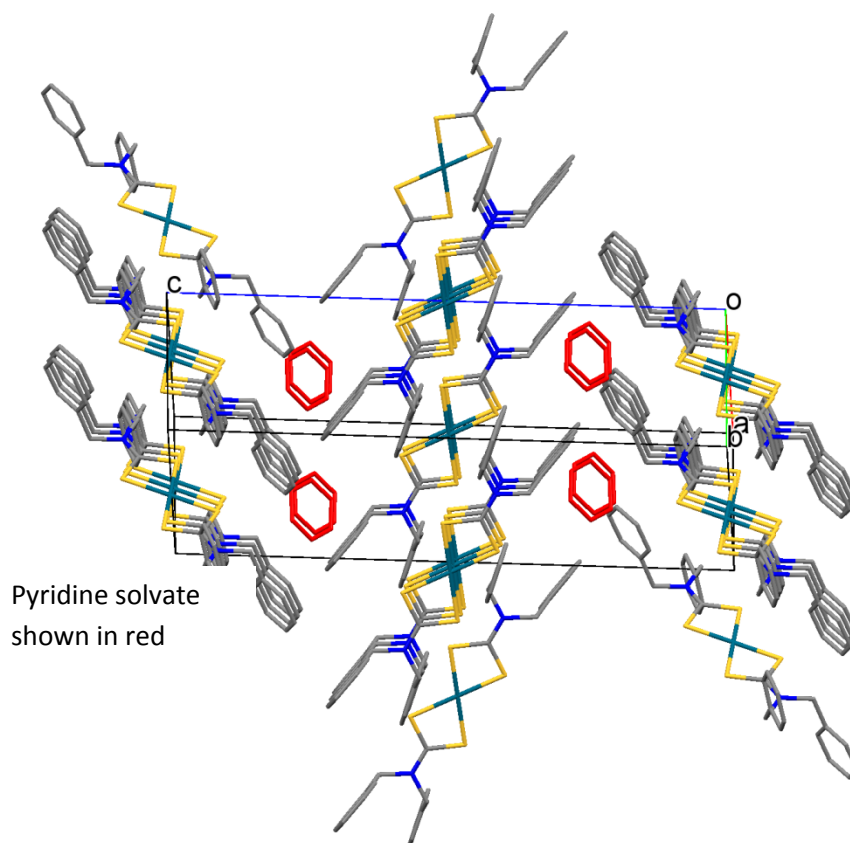

### Precursor $[\text{Pd}(\text{S}_2\text{CNCy}_2)_2]\cdot\text{py}$ (2)

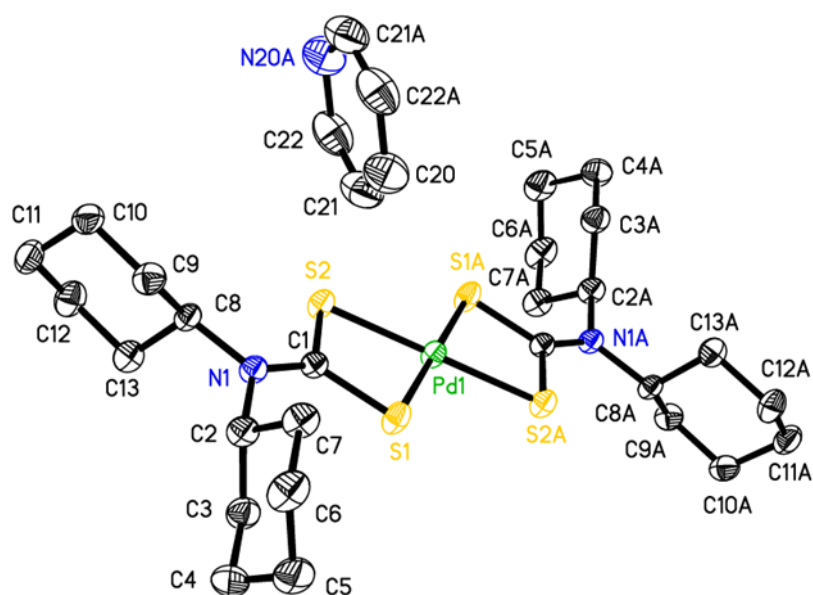

50% ellipsoids

Both the cation and the solvate pyridine molecule lie on centres of symmetry. This means that the nitrogen of the pyridine is necessarily disordered over two sites. This has been modelled by refining the C20/N20 (and C20A/N20A) site as half occupancy for each type of atom. The solvate pyridine links the molecules into chains via a weak C-H  $\cdots$  CS<sub>2</sub><sup>-</sup> interaction (C21-H21 $\cdots$  C1 2.78 Å). This leads to zig-zag chains running parallel to the c axis.

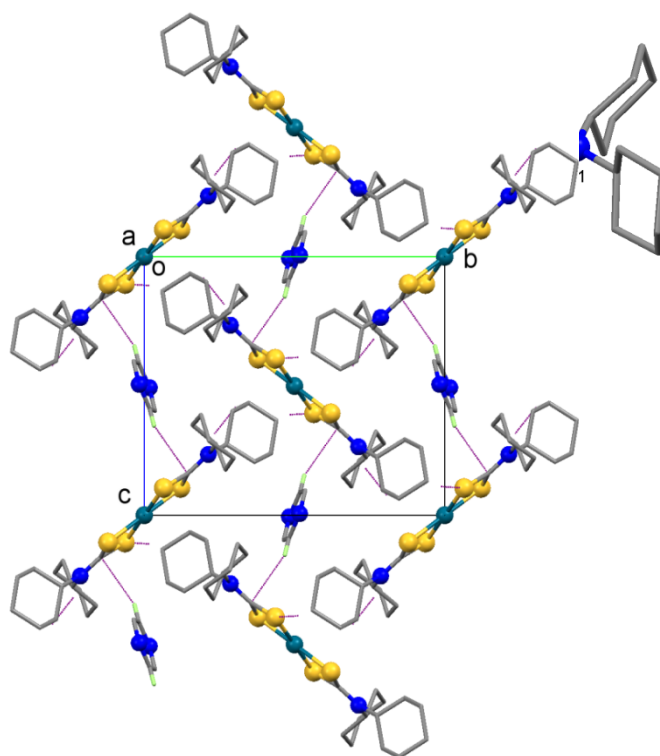

### Precursor [Pd(S<sub>2</sub>CN<sup>n</sup>Hex<sub>2</sub>)<sub>3</sub>] (3)

The molecule has no internal symmetry, so all the alkyl chains are independent; only one shows any disorder.

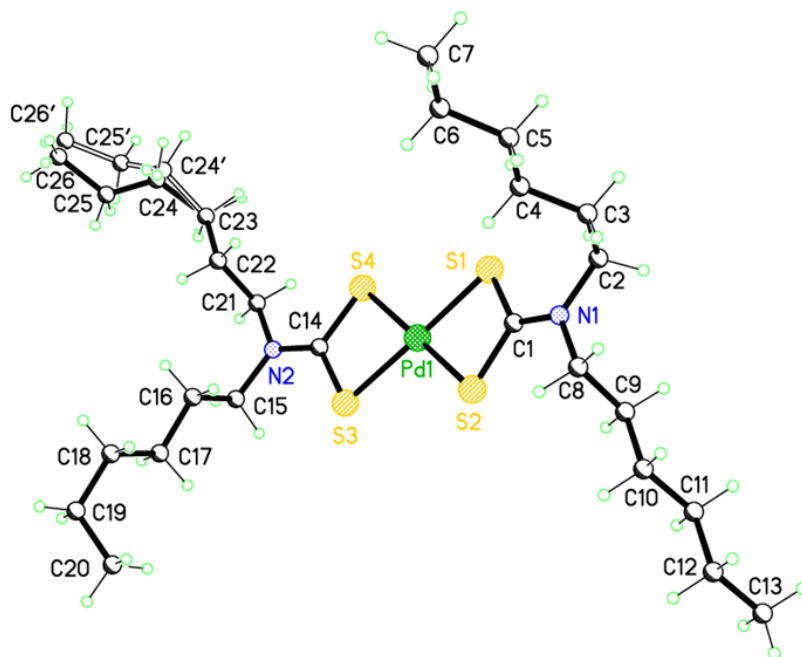

There are no particularly striking intermolecular interactions – though the packing is probably controlled by the interactions between alkyl chains.



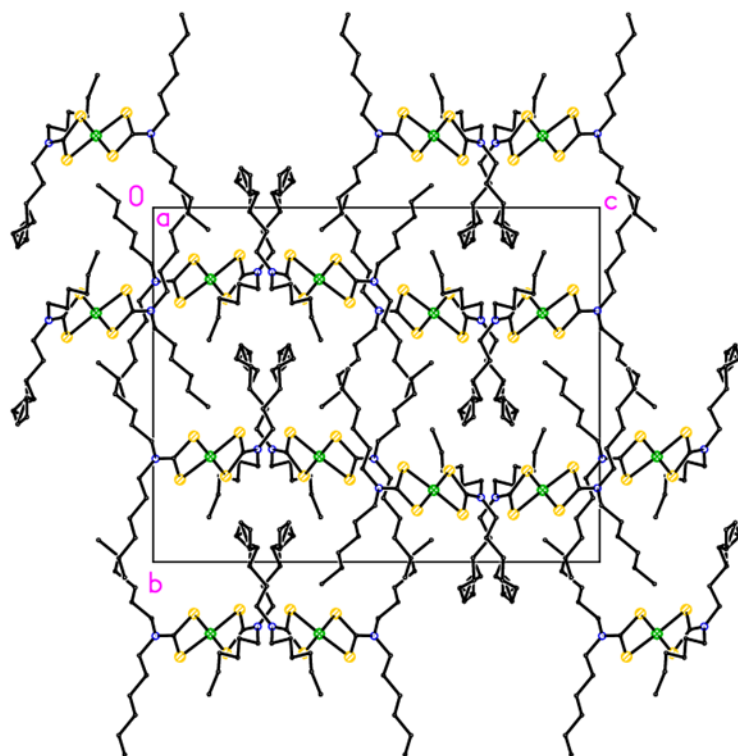

**Precursor [Pd(S<sub>2</sub>CNMeCy)<sub>2</sub>] (4)**

The Pd ion lies on a centre of symmetry, so the two halves of the molecule are related under symmetry operation  $-x+2, -y, -z+2$ .

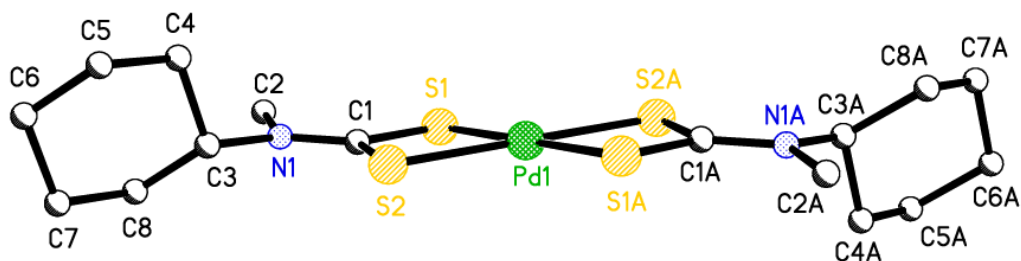

There are no very striking intermolecular interactions but, if you believe in such things, you could argue for an agnostic H interaction.

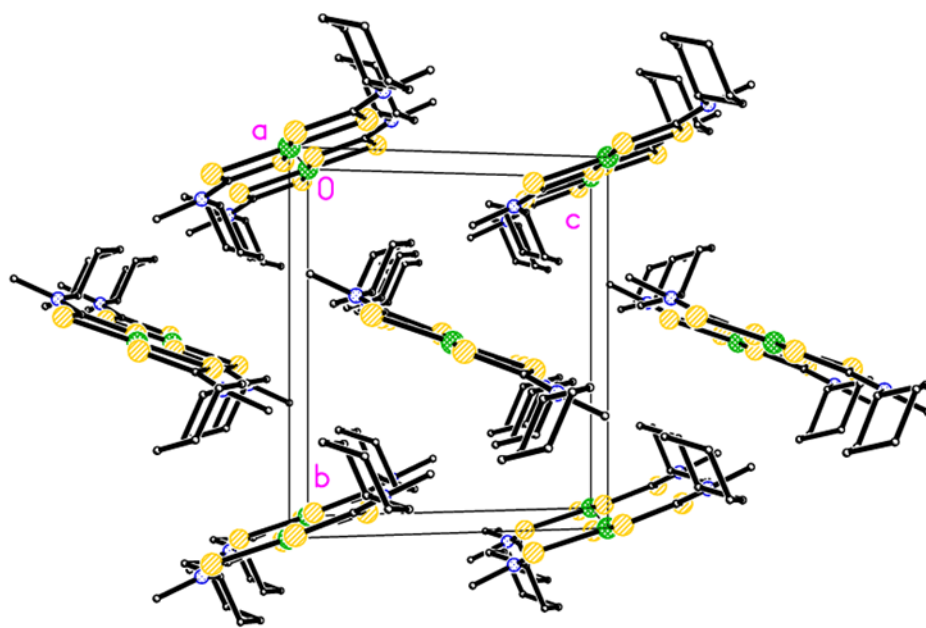

### Crystal data for [Pd(S<sub>2</sub>CNBz<sub>2</sub>)<sub>2</sub>]•py (1)

|                                                                 |                                                         |
|-----------------------------------------------------------------|---------------------------------------------------------|
| C <sub>35</sub> H <sub>33</sub> N <sub>3</sub> PdS <sub>4</sub> | $F(000) = 1496$                                         |
| $M_r = 730.28$                                                  | $D_x = 1.470 \text{ Mg m}^{-3}$                         |
| Monoclinic, $C2/c$                                              | Mo $K\alpha$ radiation, $\lambda = 0.71073 \text{ \AA}$ |
| $a = 20.803 (3) \text{ \AA}$                                    | Cell parameters from 3931 reflections                   |
| $b = 6.3637 (8) \text{ \AA}$                                    | $\theta = 2.4\text{--}26.3^\circ$                       |
| $c = 25.240 (3) \text{ \AA}$                                    | $\mu = 0.85 \text{ mm}^{-1}$                            |
| $\beta = 99.136 (2)^\circ$                                      | $T = 150 \text{ K}$                                     |
| $V = 3299.0 (7) \text{ \AA}^3$                                  | Lath, yellow                                            |
| $Z = 4$                                                         | $0.40 \times 0.24 \times 0.07 \text{ mm}$               |

### Data collection

|                                                                                     |                                                                        |
|-------------------------------------------------------------------------------------|------------------------------------------------------------------------|
| Bruker APEX 2 CCD diffractometer                                                    | 3417 reflections with $I > 2\sigma(I)$                                 |
| Radiation source: fine-focus sealed tube                                            | $R_{\text{int}} = 0.039$                                               |
| $\omega$ rotation with narrow frames scans                                          | $\theta_{\text{max}} = 28.3^\circ$ , $\theta_{\text{min}} = 1.6^\circ$ |
| Absorption correction: multi-scan<br><i>SADABS</i> v2009/1, Sheldrick, G.M., (2009) | $h = -27 \rightarrow 27$                                               |
| $T_{\text{min}} = 0.651$ , $T_{\text{max}} = 0.746$                                 | $k = -8 \rightarrow 8$                                                 |
| 16346 measured reflections                                                          | $l = -33 \rightarrow 33$                                               |
| 4121 independent reflections                                                        |                                                                        |

### Refinement

|                                 |                                                                                    |
|---------------------------------|------------------------------------------------------------------------------------|
| Refinement on $F^2$             | 0 restraints                                                                       |
| Least-squares matrix: full      | Hydrogen site location: inferred from neighbouring sites                           |
| $R[F^2 > 2\sigma(F^2)] = 0.028$ | H-atom parameters constrained                                                      |
| $wR(F^2) = 0.064$               | $w = 1/[\sigma^2(F_o^2) + (0.0252P)^2 + 2.286P]$<br>where $P = (F_o^2 + 2F_c^2)/3$ |
| $S = 1.05$                      | $(\Delta/\sigma)_{\text{max}} = 0.001$                                             |
| 4121 reflections                | $\Delta_{\text{max}} = 0.41 \text{ e \AA}^{-3}$                                    |
| 197 parameters                  | $\Delta_{\text{min}} = -0.47 \text{ e \AA}^{-3}$                                   |

### Special details

*Geometry.* All esds (except the esd in the dihedral angle between two l.s. planes) are estimated using the full covariance matrix. The cell esds are taken into account individually in the estimation of esds in distances, angles and torsion angles; correlations between esds in cell parameters are only used when they are defined by crystal symmetry. An approximate (isotropic) treatment of cell esds is used for estimating esds involving l.s. planes.

*Fractional atomic coordinates and isotropic or equivalent isotropic displacement parameters*  
( $\text{\AA}^2$ )

|     | <i>x</i>     | <i>y</i>    | <i>z</i>     | $U_{\text{iso}}^*/U_{\text{eq}}$ |
|-----|--------------|-------------|--------------|----------------------------------|
| Pd1 | 0.7500       | 1.2500      | 0.5000       | 0.01913 (6)                      |
| S1  | 0.68918 (2)  | 0.95070 (8) | 0.51177 (2)  | 0.02225 (11)                     |
| S2  | 0.72068 (2)  | 1.11437 (8) | 0.41437 (2)  | 0.02273 (11)                     |
| C1  | 0.68112 (9)  | 0.9187 (3)  | 0.44329 (7)  | 0.0197 (4)                       |
| N1  | 0.64856 (7)  | 0.7645 (2)  | 0.41588 (6)  | 0.0205 (3)                       |
| C2  | 0.63986 (9)  | 0.7573 (3)  | 0.35667 (7)  | 0.0231 (4)                       |
| H2A | 0.6501       | 0.8974      | 0.3431       | 0.028*                           |
| H2B | 0.5937       | 0.7264      | 0.3426       | 0.028*                           |
| C3  | 0.68207 (10) | 0.5951 (3)  | 0.33548 (7)  | 0.0227 (4)                       |
| C4  | 0.74940 (10) | 0.5964 (3)  | 0.35054 (8)  | 0.0263 (4)                       |
| H4  | 0.7695       | 0.6994      | 0.3750       | 0.032*                           |
| C5  | 0.78714 (11) | 0.4471 (4)  | 0.32986 (9)  | 0.0331 (5)                       |
| H5  | 0.8330       | 0.4473      | 0.3406       | 0.040*                           |
| C6  | 0.75848 (13) | 0.2976 (4)  | 0.29365 (9)  | 0.0382 (6)                       |
| H6  | 0.7846       | 0.1968      | 0.2792       | 0.046*                           |
| C7  | 0.69202 (13) | 0.2962 (4)  | 0.27874 (9)  | 0.0369 (6)                       |
| H7  | 0.6722       | 0.1939      | 0.2540       | 0.044*                           |
| C8  | 0.65372 (11) | 0.4428 (3)  | 0.29959 (8)  | 0.0297 (5)                       |
| H8  | 0.6078       | 0.4394      | 0.2894       | 0.036*                           |
| C9  | 0.61989 (9)  | 0.5888 (3)  | 0.44189 (8)  | 0.0232 (4)                       |
| H9A | 0.6355       | 0.5946      | 0.4810       | 0.028*                           |
| H9B | 0.6352       | 0.4548      | 0.4283       | 0.028*                           |
| C10 | 0.54626 (9)  | 0.5915 (3)  | 0.43208 (8)  | 0.0242 (4)                       |
| C11 | 0.51221 (11) | 0.7679 (4)  | 0.44323 (10) | 0.0384 (5)                       |
| H11 | 0.5351       | 0.8921      | 0.4557       | 0.046*                           |
| C12 | 0.44456 (12) | 0.7644 (5)  | 0.43631 (11) | 0.0501 (7)                       |
| H12 | 0.4215       | 0.8867      | 0.4440       | 0.060*                           |
| C13 | 0.41089 (12) | 0.5875 (5)  | 0.41858 (11) | 0.0518 (7)                       |
| H13 | 0.3647       | 0.5860      | 0.4142       | 0.062*                           |
| C14 | 0.44432 (13) | 0.4116 (5)  | 0.40720 (12) | 0.0567 (8)                       |
| H14 | 0.4210       | 0.2879      | 0.3949       | 0.068*                           |
| C15 | 0.51217 (11) | 0.4125 (4)  | 0.41346 (11) | 0.0419 (6)                       |
| H15 | 0.5349       | 0.2907      | 0.4050       | 0.050*                           |
| N20 | 0.5000       | 0.6822 (5)  | 0.2500       | 0.0400 (7)                       |
| C21 | 0.47047 (12) | 0.7898 (5)  | 0.28403 (11) | 0.0471 (7)                       |
| H21 | 0.4489       | 0.7142      | 0.3085       | 0.057*                           |

|     |              |            |              |             |
|-----|--------------|------------|--------------|-------------|
| C22 | 0.46959 (14) | 1.0040 (5) | 0.28565 (15) | 0.0693 (10) |
| H22 | 0.4483       | 1.0755     | 0.3110       | 0.083*      |
| C23 | 0.5000       | 1.1144 (7) | 0.2500       | 0.086 (2)   |
| H23 | 0.5000       | 1.2637     | 0.2500       | 0.103*      |

*Atomic displacement parameters (Å<sup>2</sup>)*

|     | $U^{11}$     | $U^{22}$     | $U^{33}$     | $U^{12}$     | $U^{13}$     | $U^{23}$      |
|-----|--------------|--------------|--------------|--------------|--------------|---------------|
| Pd1 | 0.01917 (10) | 0.01918 (10) | 0.01898 (11) | 0.00334 (8)  | 0.00289 (7)  | -0.00179 (8)  |
| S1  | 0.0245 (2)   | 0.0240 (2)   | 0.0189 (2)   | 0.00169 (19) | 0.00560 (18) | -0.00193 (19) |
| S2  | 0.0266 (3)   | 0.0222 (2)   | 0.0197 (2)   | 0.00002 (19) | 0.00472 (19) | -0.00054 (19) |
| C1  | 0.0155 (9)   | 0.0221 (10)  | 0.0215 (9)   | 0.0062 (7)   | 0.0034 (7)   | 0.0003 (8)    |
| N1  | 0.0203 (8)   | 0.0219 (8)   | 0.0196 (8)   | 0.0033 (7)   | 0.0038 (6)   | -0.0014 (7)   |
| C2  | 0.0229 (9)   | 0.0256 (10)  | 0.0198 (9)   | 0.0024 (8)   | 0.0002 (7)   | -0.0006 (8)   |
| C3  | 0.0286 (10)  | 0.0219 (10)  | 0.0181 (9)   | 0.0005 (8)   | 0.0059 (8)   | 0.0031 (8)    |
| C4  | 0.0309 (11)  | 0.0261 (11)  | 0.0229 (10)  | 0.0003 (9)   | 0.0078 (8)   | 0.0036 (8)    |
| C5  | 0.0327 (12)  | 0.0373 (13)  | 0.0323 (12)  | 0.0074 (10)  | 0.0149 (9)   | 0.0088 (10)   |
| C6  | 0.0570 (16)  | 0.0322 (13)  | 0.0310 (12)  | 0.0124 (11)  | 0.0243 (11)  | 0.0042 (9)    |
| C7  | 0.0591 (16)  | 0.0293 (12)  | 0.0243 (11)  | 0.0011 (10)  | 0.0126 (11)  | -0.0055 (9)   |
| C8  | 0.0360 (12)  | 0.0297 (11)  | 0.0226 (10)  | -0.0023 (9)  | 0.0025 (9)   | -0.0011 (9)   |
| C9  | 0.0228 (10)  | 0.0199 (10)  | 0.0270 (10)  | 0.0020 (8)   | 0.0041 (8)   | 0.0002 (8)    |
| C10 | 0.0211 (10)  | 0.0277 (11)  | 0.0243 (10)  | 0.0021 (8)   | 0.0055 (8)   | 0.0026 (8)    |
| C11 | 0.0300 (11)  | 0.0442 (14)  | 0.0409 (13)  | 0.0087 (10)  | 0.0050 (10)  | -0.0114 (11)  |
| C12 | 0.0313 (13)  | 0.075 (2)    | 0.0453 (15)  | 0.0225 (14)  | 0.0095 (11)  | -0.0028 (14)  |
| C13 | 0.0228 (12)  | 0.085 (2)    | 0.0485 (16)  | 0.0030 (14)  | 0.0101 (11)  | 0.0187 (15)   |
| C14 | 0.0341 (14)  | 0.0607 (19)  | 0.073 (2)    | -0.0194 (14) | 0.0006 (13)  | 0.0090 (15)   |
| C15 | 0.0305 (12)  | 0.0351 (13)  | 0.0598 (16)  | -0.0049 (10) | 0.0067 (11)  | 0.0006 (12)   |
| N20 | 0.0352 (15)  | 0.0361 (15)  | 0.0457 (17)  | 0.000        | -0.0027 (13) | 0.000         |
| C21 | 0.0355 (13)  | 0.0625 (19)  | 0.0415 (14)  | -0.0001 (12) | 0.0004 (11)  | 0.0021 (13)   |
| C22 | 0.0362 (16)  | 0.065 (2)    | 0.103 (3)    | 0.0071 (14)  | -0.0011 (16) | -0.039 (2)    |
| C23 | 0.033 (2)    | 0.029 (2)    | 0.181 (6)    | 0.000        | -0.026 (3)   | 0.000         |

*Geometric parameters (Å, °) for [Pd(S<sub>2</sub>CNBz<sub>2</sub>)<sub>2</sub>]•py (1)*

|                     |             |         |           |
|---------------------|-------------|---------|-----------|
| Pd1—S2 <sup>i</sup> | 2.3171 (5)  | C6—C7   | 1.374 (4) |
| Pd1—S2              | 2.3172 (5)  | C7—C8   | 1.384 (3) |
| Pd1—S1              | 2.3315 (5)  | C9—C10  | 1.512 (3) |
| Pd1—S1 <sup>i</sup> | 2.3316 (5)  | C10—C11 | 1.380 (3) |
| S1—C1               | 1.7220 (19) | C10—C15 | 1.384 (3) |

|                                      |              |                            |             |
|--------------------------------------|--------------|----------------------------|-------------|
| S2—C1                                | 1.718 (2)    | C11—C12                    | 1.390 (3)   |
| C1—N1                                | 1.323 (2)    | C12—C13                    | 1.364 (4)   |
| N1—C9                                | 1.470 (2)    | C13—C14                    | 1.372 (4)   |
| N1—C2                                | 1.477 (2)    | C14—C15                    | 1.395 (3)   |
| C2—C3                                | 1.507 (3)    | N20—C21                    | 1.323 (3)   |
| C3—C4                                | 1.392 (3)    | N20—C21 <sup>ii</sup>      | 1.323 (3)   |
| C3—C8                                | 1.393 (3)    | C21—C22                    | 1.364 (4)   |
| C4—C5                                | 1.386 (3)    | C22—C23                    | 1.373 (4)   |
| C5—C6                                | 1.387 (3)    | C23—C22 <sup>ii</sup>      | 1.373 (4)   |
|                                      |              |                            |             |
| S2 <sup>i</sup> —Pd1—S2              | 180.00 (2)   | C5—C4—C3                   | 119.9 (2)   |
| S2 <sup>i</sup> —Pd1—S1              | 104.671 (17) | C4—C5—C6                   | 120.6 (2)   |
| S2—Pd1—S1                            | 75.329 (17)  | C7—C6—C5                   | 119.6 (2)   |
| S2 <sup>i</sup> —Pd1—S1 <sup>i</sup> | 75.331 (17)  | C6—C7—C8                   | 120.4 (2)   |
| S2—Pd1—S1 <sup>i</sup>               | 104.669 (17) | C7—C8—C3                   | 120.5 (2)   |
| S1—Pd1—S1 <sup>i</sup>               | 180.0        | N1—C9—C10                  | 112.98 (16) |
| C1—S1—Pd1                            | 86.40 (7)    | C11—C10—C15                | 119.1 (2)   |
| C1—S2—Pd1                            | 86.95 (6)    | C11—C10—C9                 | 121.02 (19) |
| N1—C1—S2                             | 123.74 (14)  | C15—C10—C9                 | 119.82 (19) |
| N1—C1—S1                             | 124.94 (15)  | C10—C11—C12                | 120.2 (2)   |
| S2—C1—S1                             | 111.32 (11)  | C13—C12—C11                | 120.8 (2)   |
| C1—N1—C9                             | 122.73 (16)  | C12—C13—C14                | 119.4 (2)   |
| C1—N1—C2                             | 121.46 (16)  | C13—C14—C15                | 120.7 (3)   |
| C9—N1—C2                             | 115.80 (15)  | C10—C15—C14                | 119.8 (2)   |
| N1—C2—C3                             | 113.29 (15)  | C21—N20—C21 <sup>ii</sup>  | 117.7 (3)   |
| C4—C3—C8                             | 119.05 (19)  | N20—C21—C22                | 123.1 (3)   |
| C4—C3—C2                             | 121.12 (18)  | C21—C22—C23                | 118.8 (3)   |
| C8—C3—C2                             | 119.82 (18)  | C22 <sup>ii</sup> —C23—C22 | 118.4 (4)   |

Symmetry codes: (i)  $-x+3/2, -y+5/2, -z+1$ ; (ii)  $-x+1, y, -z+1/2$ .

\*\*\*\*\*

### Crystal data for [Pd(S<sub>2</sub>CNCy<sub>2</sub>)<sub>2</sub>]•py (2)

|                                                                 |                                                         |
|-----------------------------------------------------------------|---------------------------------------------------------|
| C <sub>31</sub> H <sub>49</sub> N <sub>3</sub> PdS <sub>4</sub> | $F(000) = 732$                                          |
| $M_r = 698.37$                                                  | $D_x = 1.408 \text{ Mg m}^{-3}$                         |
| Monoclinic, $P2_1/n$                                            | Mo $K\alpha$ radiation, $\lambda = 0.71073 \text{ \AA}$ |
| $a = 9.9610 (13) \text{ \AA}$                                   | Cell parameters from 3121 reflections                   |
| $b = 14.0277 (19) \text{ \AA}$                                  | $\theta = 2.3\text{--}23.8^\circ$                       |
| $c = 12.1552 (16) \text{ \AA}$                                  | $\mu = 0.84 \text{ mm}^{-1}$                            |
| $\beta = 104.023 (2)^\circ$                                     | $T = 150 \text{ K}$                                     |
| $V = 1647.8 (4) \text{ \AA}^3$                                  | Block, yellow                                           |
| $Z = 2$                                                         | $0.24 \times 0.16 \times 0.16 \text{ mm}$               |

### Data collection

|                                                                              |                                                                        |
|------------------------------------------------------------------------------|------------------------------------------------------------------------|
| Bruker APEX 2 CCD diffractometer                                             | 3135 reflections with $I > 2\sigma(I)$                                 |
| Radiation source: fine-focus sealed tube                                     | $R_{\text{int}} = 0.048$                                               |
| $\omega$ rotation with narrow frames scans                                   | $\theta_{\text{max}} = 28.4^\circ$ , $\theta_{\text{min}} = 2.3^\circ$ |
| Absorption correction: multi-scan<br>SADABS v2009/1, Sheldrick, G.M., (2009) | $h = -13 \rightarrow 13$                                               |
| $T_{\text{min}} = 0.629$ , $T_{\text{max}} = 0.746$                          | $k = -18 \rightarrow 18$                                               |
| 16333 measured reflections                                                   | $l = -16 \rightarrow 16$                                               |
| 4109 independent reflections                                                 |                                                                        |

### Refinement

|                                 |                                                                           |
|---------------------------------|---------------------------------------------------------------------------|
| Refinement on $F^2$             | 0 restraints                                                              |
| Least-squares matrix: full      | Hydrogen site location: inferred from neighbouring sites                  |
| $R[F^2 > 2\sigma(F^2)] = 0.035$ | H-atom parameters constrained                                             |
| $wR(F^2) = 0.083$               | $w = 1/[\sigma^2(F_o^2) + (0.0438P)^2]$<br>where $P = (F_o^2 + 2F_c^2)/3$ |
| $S = 1.00$                      | $(\Delta/\sigma)_{\text{max}} < 0.001$                                    |
| 4109 reflections                | $\Delta_{\text{max}} = 0.48 \text{ e \AA}^{-3}$                           |
| 178 parameters                  | $\Delta_{\text{min}} = -0.76 \text{ e \AA}^{-3}$                          |

### Special details

*Geometry.* All esds (except the esd in the dihedral angle between two l.s. planes) are estimated using the full covariance matrix. The cell esds are taken into account individually in the estimation of esds in distances, angles and torsion angles; correlations between esds in cell parameters are only used when they are defined by crystal symmetry. An approximate (isotropic)

treatment of cell esds is used for estimating esds involving l.s. planes.

*Fractional atomic coordinates and isotropic or equivalent isotropic displacement parameters*  
( $\text{\AA}^2$ )

|      | x            | y            | z            | $U_{\text{iso}}^*/U_{\text{eq}}$ | Occ. (<1) |
|------|--------------|--------------|--------------|----------------------------------|-----------|
| Pd1  | 0.5000       | 0.5000       | 0.5000       | 0.02289 (8)                      |           |
| S1   | 0.29497 (6)  | 0.43575 (5)  | 0.39469 (5)  | 0.02969 (15)                     |           |
| S2   | 0.56729 (6)  | 0.37897 (4)  | 0.39431 (5)  | 0.02556 (14)                     |           |
| C1   | 0.3927 (2)   | 0.35557 (16) | 0.33886 (19) | 0.0227 (5)                       |           |
| N1   | 0.34478 (19) | 0.28685 (14) | 0.26479 (16) | 0.0233 (4)                       |           |
| C2   | 0.1947 (2)   | 0.26188 (18) | 0.2254 (2)   | 0.0273 (5)                       |           |
| H2   | 0.1908       | 0.2050       | 0.1752       | 0.033*                           |           |
| C3   | 0.1345 (3)   | 0.22920 (19) | 0.3227 (2)   | 0.0330 (6)                       |           |
| H3A  | 0.1436       | 0.2809       | 0.3795       | 0.040*                           |           |
| H3B  | 0.1867       | 0.1732       | 0.3602       | 0.040*                           |           |
| C4   | -0.0193 (3)  | 0.2026 (2)   | 0.2784 (3)   | 0.0407 (7)                       |           |
| H4A  | -0.0273      | 0.1457       | 0.2291       | 0.049*                           |           |
| H4B  | -0.0592      | 0.1866       | 0.3432       | 0.049*                           |           |
| C5   | -0.1000 (3)  | 0.2844 (2)   | 0.2119 (3)   | 0.0427 (7)                       |           |
| H5A  | -0.1983      | 0.2657       | 0.1843       | 0.051*                           |           |
| H5B  | -0.0958      | 0.3404       | 0.2622       | 0.051*                           |           |
| C6   | -0.0415 (3)  | 0.3108 (2)   | 0.1120 (2)   | 0.0397 (7)                       |           |
| H6A  | -0.0952      | 0.3645       | 0.0703       | 0.048*                           |           |
| H6B  | -0.0508      | 0.2558       | 0.0596       | 0.048*                           |           |
| C7   | 0.1119 (2)   | 0.33939 (19) | 0.1507 (2)   | 0.0321 (6)                       |           |
| H7A  | 0.1498       | 0.3496       | 0.0835       | 0.038*                           |           |
| H7B  | 0.1202       | 0.4000       | 0.1936       | 0.038*                           |           |
| C8   | 0.4459 (2)   | 0.22556 (16) | 0.22565 (19) | 0.0228 (5)                       |           |
| H8   | 0.5354       | 0.2613       | 0.2422       | 0.027*                           |           |
| C9   | 0.4070 (3)   | 0.20643 (18) | 0.0979 (2)   | 0.0302 (6)                       |           |
| H9A  | 0.3209       | 0.1682       | 0.0775       | 0.036*                           |           |
| H9B  | 0.3904       | 0.2675       | 0.0560       | 0.036*                           |           |
| C10  | 0.5247 (3)   | 0.15243 (19) | 0.0655 (2)   | 0.0334 (6)                       |           |
| H10A | 0.4975       | 0.1369       | -0.0164      | 0.040*                           |           |
| H10B | 0.6075       | 0.1939       | 0.0787       | 0.040*                           |           |
| C11  | 0.5613 (3)   | 0.06065 (19) | 0.1330 (2)   | 0.0378 (6)                       |           |
| H11A | 0.6434       | 0.0314       | 0.1143       | 0.045*                           |           |
| H11B | 0.4834       | 0.0152       | 0.1110       | 0.045*                           |           |
| C12  | 0.5917 (3)   | 0.0784 (2)   | 0.2605 (2)   | 0.0363 (6)                       |           |



|      |            |              |             |            |     |
|------|------------|--------------|-------------|------------|-----|
| H12A | 0.6783     | 0.1156       | 0.2846      | 0.044*     |     |
| H12B | 0.6055     | 0.0166       | 0.3010      | 0.044*     |     |
| C13  | 0.4729 (3) | 0.13291 (18) | 0.2929 (2)  | 0.0300 (5) |     |
| H13A | 0.3882     | 0.0932       | 0.2762      | 0.036*     |     |
| H13B | 0.4979     | 0.1471       | 0.3751      | 0.036*     |     |
| N20  | 0.3590 (3) | 0.5171 (2)   | -0.0063 (3) | 0.0484 (7) | 0.5 |
| C20  | 0.3590 (3) | 0.5171 (2)   | -0.0063 (3) | 0.0484 (7) | 0.5 |
| H20  | 0.2639     | 0.5286       | -0.0104     | 0.058*     | 0.5 |
| C21  | 0.4461 (4) | 0.4815 (2)   | 0.0886 (3)  | 0.0480 (8) |     |
| H21  | 0.4105     | 0.4678       | 0.1526      | 0.058*     |     |
| C22  | 0.5836 (3) | 0.4647 (2)   | 0.0955 (3)  | 0.0481 (8) |     |
| H22  | 0.6402     | 0.4398       | 0.1638      | 0.058*     |     |

*Atomic displacement parameters (Å<sup>2</sup>)*

|     | $U^{11}$     | $U^{22}$     | $U^{33}$     | $U^{12}$     | $U^{13}$     | $U^{23}$      |
|-----|--------------|--------------|--------------|--------------|--------------|---------------|
| Pd1 | 0.01810 (13) | 0.02603 (14) | 0.02317 (14) | 0.00033 (10) | 0.00234 (9)  | -0.00655 (11) |
| S1  | 0.0182 (3)   | 0.0343 (3)   | 0.0347 (3)   | 0.0013 (2)   | 0.0027 (2)   | -0.0139 (3)   |
| S2  | 0.0175 (3)   | 0.0302 (3)   | 0.0273 (3)   | 0.0000 (2)   | 0.0020 (2)   | -0.0090 (2)   |
| C1  | 0.0210 (11)  | 0.0248 (12)  | 0.0221 (11)  | 0.0003 (9)   | 0.0046 (9)   | -0.0007 (9)   |
| N1  | 0.0170 (9)   | 0.0269 (10)  | 0.0250 (10)  | -0.0012 (8)  | 0.0032 (8)   | -0.0044 (8)   |
| C2  | 0.0164 (11)  | 0.0337 (14)  | 0.0293 (13)  | -0.0034 (10) | 0.0006 (9)   | -0.0059 (10)  |
| C3  | 0.0251 (13)  | 0.0363 (14)  | 0.0375 (15)  | -0.0004 (11) | 0.0072 (11)  | -0.0023 (12)  |
| C4  | 0.0243 (13)  | 0.0408 (16)  | 0.0588 (19)  | -0.0076 (12) | 0.0132 (13)  | -0.0048 (14)  |
| C5  | 0.0183 (13)  | 0.0511 (18)  | 0.0568 (19)  | -0.0043 (12) | 0.0052 (12)  | -0.0105 (15)  |
| C6  | 0.0236 (13)  | 0.0542 (18)  | 0.0367 (15)  | 0.0037 (12)  | -0.0019 (11) | -0.0084 (13)  |
| C7  | 0.0235 (12)  | 0.0405 (15)  | 0.0293 (13)  | -0.0001 (11) | 0.0007 (10)  | -0.0024 (11)  |
| C8  | 0.0170 (11)  | 0.0270 (12)  | 0.0241 (12)  | -0.0009 (9)  | 0.0041 (9)   | -0.0068 (9)   |
| C9  | 0.0317 (14)  | 0.0347 (14)  | 0.0238 (13)  | -0.0017 (11) | 0.0058 (10)  | -0.0025 (10)  |
| C10 | 0.0331 (14)  | 0.0370 (15)  | 0.0329 (14)  | -0.0095 (11) | 0.0137 (11)  | -0.0121 (11)  |
| C11 | 0.0323 (14)  | 0.0355 (15)  | 0.0494 (17)  | -0.0023 (12) | 0.0171 (13)  | -0.0156 (13)  |
| C12 | 0.0279 (14)  | 0.0379 (15)  | 0.0415 (16)  | 0.0095 (11)  | 0.0052 (12)  | -0.0021 (12)  |
| C13 | 0.0280 (13)  | 0.0328 (14)  | 0.0281 (13)  | 0.0032 (10)  | 0.0046 (10)  | -0.0006 (10)  |
| N20 | 0.0435 (16)  | 0.0521 (18)  | 0.0481 (17)  | -0.0052 (13) | 0.0079 (13)  | 0.0039 (13)   |
| C20 | 0.0435 (16)  | 0.0521 (18)  | 0.0481 (17)  | -0.0052 (13) | 0.0079 (13)  | 0.0039 (13)   |
| C21 | 0.059 (2)    | 0.0480 (19)  | 0.0383 (16)  | -0.0152 (15) | 0.0134 (15)  | 0.0017 (13)   |
| C22 | 0.055 (2)    | 0.0406 (16)  | 0.0408 (17)  | -0.0065 (15) | -0.0045 (15) | 0.0091 (13)   |

*Geometric parameters (Å, °) for [Pd(S<sub>2</sub>CNCy<sub>2</sub>)<sub>2</sub>]•py (2)*

|                                      |             |                            |             |
|--------------------------------------|-------------|----------------------------|-------------|
| Pd1—S1 <sup>i</sup>                  | 2.3140 (6)  | C5—C6                      | 1.515 (4)   |
| Pd1—S1                               | 2.3141 (6)  | C6—C7                      | 1.538 (3)   |
| Pd1—S2                               | 2.3237 (6)  | C8—C13                     | 1.524 (3)   |
| Pd1—S2 <sup>i</sup>                  | 2.3237 (6)  | C8—C9                      | 1.530 (3)   |
| S1—C1                                | 1.730 (2)   | C9—C10                     | 1.526 (3)   |
| S2—C1                                | 1.738 (2)   | C10—C11                    | 1.523 (4)   |
| C1—N1                                | 1.326 (3)   | C11—C12                    | 1.525 (4)   |
| N1—C8                                | 1.487 (3)   | C12—C13                    | 1.538 (3)   |
| N1—C2                                | 1.496 (3)   | N20—C21                    | 1.359 (4)   |
| C2—C3                                | 1.521 (3)   | N20—C22 <sup>ii</sup>      | 1.367 (4)   |
| C2—C7                                | 1.525 (3)   | C21—C22                    | 1.372 (4)   |
| C3—C4                                | 1.542 (3)   | C22—C20 <sup>ii</sup>      | 1.367 (4)   |
| C4—C5                                | 1.517 (4)   | C22—N20 <sup>ii</sup>      | 1.367 (4)   |
|                                      |             |                            |             |
| S1 <sup>i</sup> —Pd1—S1              | 180.0       | C2—C3—C4                   | 110.3 (2)   |
| S1 <sup>i</sup> —Pd1—S2              | 104.85 (2)  | C5—C4—C3                   | 110.9 (2)   |
| S1—Pd1—S2                            | 75.15 (2)   | C6—C5—C4                   | 110.8 (2)   |
| S1 <sup>i</sup> —Pd1—S2 <sup>i</sup> | 75.15 (2)   | C5—C6—C7                   | 111.4 (2)   |
| S1—Pd1—S2 <sup>i</sup>               | 104.85 (2)  | C2—C7—C6                   | 110.5 (2)   |
| S2—Pd1—S2 <sup>i</sup>               | 180.0       | N1—C8—C13                  | 111.54 (19) |
| C1—S1—Pd1                            | 88.01 (8)   | N1—C8—C9                   | 113.67 (19) |
| C1—S2—Pd1                            | 87.52 (8)   | C13—C8—C9                  | 111.28 (19) |
| N1—C1—S1                             | 126.50 (17) | C10—C9—C8                  | 109.1 (2)   |
| N1—C1—S2                             | 124.21 (17) | C11—C10—C9                 | 112.2 (2)   |
| S1—C1—S2                             | 109.29 (13) | C10—C11—C12                | 111.9 (2)   |
| C1—N1—C8                             | 118.51 (18) | C11—C12—C13                | 111.4 (2)   |
| C1—N1—C2                             | 123.67 (19) | C8—C13—C12                 | 109.5 (2)   |
| C8—N1—C2                             | 117.61 (18) | C21—N20—C22 <sup>ii</sup>  | 115.9 (3)   |
| N1—C2—C3                             | 111.92 (19) | N20—C21—C22                | 122.6 (3)   |
| N1—C2—C7                             | 112.22 (19) | C20 <sup>ii</sup> —C22—C21 | 121.5 (3)   |
| C3—C2—C7                             | 114.8 (2)   | N20 <sup>ii</sup> —C22—C21 | 121.5 (3)   |

Symmetry codes: (i)  $-x+1, -y+1, -z+1$ ; (ii)  $-x+1, -y+1, -z$ .

\*\*\*\*\*

### Crystal data for [Pd(S<sub>2</sub>CN<sup>n</sup>Hex<sub>2</sub>)<sub>3</sub>] (3)

|                                                                 |                                                         |
|-----------------------------------------------------------------|---------------------------------------------------------|
| C <sub>26</sub> H <sub>52</sub> N <sub>2</sub> PdS <sub>4</sub> | $D_x = 1.267 \text{ Mg m}^{-3}$                         |
| $M_r = 627.33$                                                  | Mo $K\alpha$ radiation, $\lambda = 0.71073 \text{ \AA}$ |
| Orthorhombic, $Pbca$                                            | Cell parameters from 6444 reflections                   |
| $a = 12.3351 (11) \text{ \AA}$                                  | $\theta = 2.7\text{--}23.8^\circ$                       |
| $b = 20.5728 (19) \text{ \AA}$                                  | $\mu = 0.83 \text{ mm}^{-1}$                            |
| $c = 25.918 (2) \text{ \AA}$                                    | $T = 150 \text{ K}$                                     |
| $V = 6577.2 (10) \text{ \AA}^3$                                 | Block, yellow                                           |
| $Z = 8$                                                         | $0.34 \times 0.24 \times 0.15 \text{ mm}$               |
| $F(000) = 2656$                                                 |                                                         |

### Data collection

|                                                                                    |                                                                        |
|------------------------------------------------------------------------------------|------------------------------------------------------------------------|
| Bruker APEX-II CCD diffractometer                                                  | 5263 reflections with $I > 2\sigma(I)$                                 |
| Radiation source: fine-focus sealed tube                                           | $R_{\text{int}} = 0.070$                                               |
| $\omega$ rotation with narrow frames scans                                         | $\theta_{\text{max}} = 28.3^\circ$ , $\theta_{\text{min}} = 1.6^\circ$ |
| Absorption correction: multi-scan<br><i>SADABS</i> 2012/1, Sheldrick, G.M., (2012) | $h = -16 \rightarrow 16$                                               |
| $T_{\text{min}} = 0.664$ , $T_{\text{max}} = 0.746$                                | $k = -27 \rightarrow 26$                                               |
| 64543 measured reflections                                                         | $l = -34 \rightarrow 34$                                               |
| 8186 independent reflections                                                       |                                                                        |

### Refinement

|                                 |                                                                                     |
|---------------------------------|-------------------------------------------------------------------------------------|
| Refinement on $F^2$             | 20 restraints                                                                       |
| Least-squares matrix: full      | Hydrogen site location: inferred from neighbouring sites                            |
| $R[F^2 > 2\sigma(F^2)] = 0.038$ | H-atom parameters constrained                                                       |
| $wR(F^2) = 0.096$               | $w = 1/[\sigma^2(F_o^2) + (0.0351P)^2 + 4.0416P]$<br>where $P = (F_o^2 + 2F_c^2)/3$ |
| $S = 1.01$                      | $(\Delta/\sigma)_{\text{max}} = 0.002$                                              |
| 8186 reflections                | $\Delta_{\text{max}} = 0.65 \text{ e \AA}^{-3}$                                     |
| 311 parameters                  | $\Delta_{\text{min}} = -0.60 \text{ e \AA}^{-3}$                                    |

### Special details

*Geometry.* All esds (except the esd in the dihedral angle between two l.s. planes) are estimated using the full covariance matrix. The cell esds are taken into account individually in the estimation of esds in distances, angles and torsion angles; correlations between esds in cell parameters are only used when they are defined by crystal symmetry. An approximate (isotropic) treatment of cell esds is used for estimating esds involving l.s. planes.

*Fractional atomic coordinates and isotropic or equivalent isotropic displacement parameters  
(Å<sup>2</sup>)*

|      | x            | y             | z            | $U_{iso}^*/U_{eq}$ | Occ. (<1) |
|------|--------------|---------------|--------------|--------------------|-----------|
| Pd1  | 0.75066 (2)  | 0.20252 (2)   | 0.37186 (2)  | 0.03209 (7)        |           |
| S1   | 0.60730 (6)  | 0.14575 (4)   | 0.40896 (3)  | 0.03734 (17)       |           |
| S2   | 0.69591 (6)  | 0.26743 (4)   | 0.43998 (3)  | 0.03706 (17)       |           |
| C1   | 0.6035 (2)   | 0.20718 (14)  | 0.45425 (11) | 0.0338 (6)         |           |
| N1   | 0.53900 (19) | 0.20860 (11)  | 0.49463 (9)  | 0.0387 (6)         |           |
| C2   | 0.4552 (2)   | 0.15901 (15)  | 0.50369 (13) | 0.0466 (8)         |           |
| H2A  | 0.4457       | 0.1331        | 0.4718       | 0.056*             |           |
| H2B  | 0.3856       | 0.1810        | 0.5111       | 0.056*             |           |
| C3   | 0.4815 (3)   | 0.11318 (16)  | 0.54805 (13) | 0.0514 (9)         |           |
| H3A  | 0.4906       | 0.1392        | 0.5799       | 0.062*             |           |
| H3B  | 0.4189       | 0.0839        | 0.5534       | 0.062*             |           |
| C4   | 0.5819 (3)   | 0.07223 (16)  | 0.54043 (12) | 0.0488 (8)         |           |
| H4A  | 0.6452       | 0.1013        | 0.5361       | 0.059*             |           |
| H4B  | 0.5738       | 0.0466        | 0.5083       | 0.059*             |           |
| C5   | 0.6037 (3)   | 0.02607 (17)  | 0.58509 (13) | 0.0533 (9)         |           |
| H5A  | 0.6128       | 0.0519        | 0.6170       | 0.064*             |           |
| H5B  | 0.5396       | -0.0023       | 0.5898       | 0.064*             |           |
| C6   | 0.7030 (3)   | -0.01637 (17) | 0.57782 (13) | 0.0575 (9)         |           |
| H6A  | 0.6943       | -0.0422       | 0.5459       | 0.069*             |           |
| H6B  | 0.7674       | 0.0118        | 0.5734       | 0.069*             |           |
| C7   | 0.7226 (4)   | -0.0620 (2)   | 0.62250 (16) | 0.0835 (14)        |           |
| H7A  | 0.7873       | -0.0882       | 0.6156       | 0.125*             |           |
| H7B  | 0.6598       | -0.0906       | 0.6267       | 0.125*             |           |
| H7C  | 0.7335       | -0.0367       | 0.6541       | 0.125*             |           |
| C8   | 0.5434 (3)   | 0.26356 (15)  | 0.53137 (11) | 0.0413 (7)         |           |
| H8A  | 0.6191       | 0.2792        | 0.5340       | 0.050*             |           |
| H8B  | 0.5209       | 0.2481        | 0.5659       | 0.050*             |           |
| C9   | 0.4711 (2)   | 0.31967 (15)  | 0.51528 (12) | 0.0405 (7)         |           |
| H9A  | 0.3949       | 0.3046        | 0.5140       | 0.049*             |           |
| H9B  | 0.4918       | 0.3342        | 0.4802       | 0.049*             |           |
| C10  | 0.4799 (2)   | 0.37677 (14)  | 0.55250 (11) | 0.0406 (7)         |           |
| H10A | 0.4651       | 0.3611        | 0.5879       | 0.049*             |           |
| H10B | 0.5551       | 0.3935        | 0.5517       | 0.049*             |           |
| C11  | 0.4029 (3)   | 0.43199 (14)  | 0.54034 (12) | 0.0428 (7)         |           |
| H11A | 0.3276       | 0.4154        | 0.5415       | 0.051*             |           |
| H11B | 0.4171       | 0.4474        | 0.5048       | 0.051*             |           |

|      |              |              |              |              |           |
|------|--------------|--------------|--------------|--------------|-----------|
| C12  | 0.4128 (3)   | 0.48903 (15) | 0.57706 (13) | 0.0512 (8)   |           |
| H12A | 0.3977       | 0.4739       | 0.6126       | 0.061*       |           |
| H12B | 0.4882       | 0.5055       | 0.5762       | 0.061*       |           |
| C13  | 0.3363 (4)   | 0.54376 (17) | 0.56389 (17) | 0.0750 (12)  |           |
| H13A | 0.3461       | 0.5794       | 0.5885       | 0.112*       |           |
| H13B | 0.2614       | 0.5280       | 0.5657       | 0.112*       |           |
| H13C | 0.3515       | 0.5594       | 0.5289       | 0.112*       |           |
| S3   | 0.89840 (6)  | 0.25742 (4)  | 0.33725 (3)  | 0.03849 (18) |           |
| S4   | 0.81300 (6)  | 0.13466 (4)  | 0.30663 (3)  | 0.03913 (18) |           |
| C14  | 0.9157 (2)   | 0.19052 (15) | 0.29833 (10) | 0.0364 (7)   |           |
| N2   | 0.99744 (19) | 0.18216 (13) | 0.26631 (9)  | 0.0375 (6)   |           |
| C15  | 1.0872 (2)   | 0.22925 (16) | 0.26544 (11) | 0.0421 (7)   |           |
| H15A | 1.0576       | 0.2736       | 0.2702       | 0.051*       |           |
| H15B | 1.1230       | 0.2277       | 0.2313       | 0.051*       |           |
| C16  | 1.1712 (3)   | 0.21582 (16) | 0.30735 (12) | 0.0466 (8)   |           |
| H16A | 1.1341       | 0.2112       | 0.3410       | 0.056*       |           |
| H16B | 1.2085       | 0.1743       | 0.2997       | 0.056*       |           |
| C17  | 1.2536 (3)   | 0.26956 (17) | 0.31077 (12) | 0.0473 (7)   |           |
| H17A | 1.2160       | 0.3107       | 0.3193       | 0.057*       |           |
| H17B | 1.2884       | 0.2751       | 0.2766       | 0.057*       |           |
| C18  | 1.3421 (3)   | 0.25678 (17) | 0.35151 (15) | 0.0579 (9)   |           |
| H18A | 1.3075       | 0.2521       | 0.3858       | 0.069*       |           |
| H18B | 1.3788       | 0.2152       | 0.3434       | 0.069*       |           |
| C19  | 1.4248 (3)   | 0.3094 (2)   | 0.35415 (18) | 0.0732 (12)  |           |
| H19A | 1.4545       | 0.3168       | 0.3192       | 0.088*       |           |
| H19B | 1.4852       | 0.2948       | 0.3765       | 0.088*       |           |
| C20  | 1.3807 (4)   | 0.3732 (2)   | 0.37492 (18) | 0.0882 (15)  |           |
| H20A | 1.4385       | 0.4059       | 0.3750       | 0.132*       |           |
| H20B | 1.3542       | 0.3668       | 0.4102       | 0.132*       |           |
| H20C | 1.3210       | 0.3881       | 0.3530       | 0.132*       |           |
| C21  | 1.0031 (3)   | 0.12491 (15) | 0.23198 (11) | 0.0443 (8)   |           |
| H21A | 1.0383       | 0.1380       | 0.1993       | 0.053*       |           |
| H21B | 0.9284       | 0.1109       | 0.2237       | 0.053*       |           |
| C22  | 1.0639 (3)   | 0.06790 (16) | 0.25402 (13) | 0.0510 (8)   |           |
| H22A | 1.0295       | 0.0541       | 0.2868       | 0.061*       |           |
| H22B | 1.1396       | 0.0808       | 0.2616       | 0.061*       |           |
| C23  | 1.0636 (4)   | 0.0115 (2)   | 0.21601 (16) | 0.0800 (13)  | 0.741 (9) |
| H23A | 1.0829       | 0.0276       | 0.1812       | 0.096*       | 0.741 (9) |
| H23B | 0.9901       | -0.0076      | 0.2142       | 0.096*       | 0.741 (9) |
| C24  | 1.1451 (8)   | -0.0406 (5)  | 0.2329 (4)   | 0.132 (4)    | 0.741 (9) |

|      |             |              |              |             |           |
|------|-------------|--------------|--------------|-------------|-----------|
| H24A | 1.1461      | -0.0411      | 0.2711       | 0.158*      | 0.741 (9) |
| H24B | 1.1165      | -0.0832      | 0.2216       | 0.158*      | 0.741 (9) |
| C25  | 1.2462 (6)  | -0.0366 (4)  | 0.2171 (4)   | 0.113 (3)   | 0.741 (9) |
| H25A | 1.2805      | -0.0019      | 0.2379       | 0.136*      | 0.741 (9) |
| H25B | 1.2434      | -0.0204      | 0.1812       | 0.136*      | 0.741 (9) |
| C26  | 1.3218 (7)  | -0.0911 (4)  | 0.2170 (4)   | 0.110 (3)   | 0.741 (9) |
| H26A | 1.3914      | -0.0770      | 0.2026       | 0.165*      | 0.741 (9) |
| H26B | 1.2923      | -0.1265      | 0.1960       | 0.165*      | 0.741 (9) |
| H26C | 1.3326      | -0.1064      | 0.2525       | 0.165*      | 0.741 (9) |
| C23' | 1.0636 (4)  | 0.0115 (2)   | 0.21601 (16) | 0.0800 (13) | 0.259 (9) |
| H23C | 0.9867      | -0.0018      | 0.2132       | 0.096*      | 0.259 (9) |
| H23D | 1.0826      | 0.0311       | 0.1823       | 0.096*      | 0.259 (9) |
| C24' | 1.1273 (12) | -0.0516 (7)  | 0.2184 (7)   | 0.051 (4)*  | 0.259 (9) |
| H24C | 1.1619      | -0.0516      | 0.2529       | 0.061*      | 0.259 (9) |
| H24D | 1.0717      | -0.0863      | 0.2195       | 0.061*      | 0.259 (9) |
| C25' | 1.2032 (10) | -0.0736 (7)  | 0.1864 (5)   | 0.048 (4)*  | 0.259 (9) |
| H25C | 1.2285      | -0.0346      | 0.1677       | 0.058*      | 0.259 (9) |
| H25D | 1.1630      | -0.0998      | 0.1607       | 0.058*      | 0.259 (9) |
| C26' | 1.3019 (15) | -0.1109 (10) | 0.1966 (9)   | 0.072 (6)*  | 0.259 (9) |
| H26D | 1.3405      | -0.1185      | 0.1641       | 0.107*      | 0.259 (9) |
| H26E | 1.2826      | -0.1528      | 0.2122       | 0.107*      | 0.259 (9) |
| H26F | 1.3486      | -0.0866      | 0.2202       | 0.107*      | 0.259 (9) |

*Atomic displacement parameters (Å<sup>2</sup>)*

|     | $U^{11}$     | $U^{22}$     | $U^{33}$     | $U^{12}$     | $U^{13}$     | $U^{23}$     |
|-----|--------------|--------------|--------------|--------------|--------------|--------------|
| Pd1 | 0.02670 (11) | 0.04302 (13) | 0.02655 (11) | 0.00339 (10) | 0.00003 (9)  | -0.00171 (9) |
| S1  | 0.0334 (4)   | 0.0443 (4)   | 0.0343 (4)   | -0.0004 (3)  | 0.0020 (3)   | -0.0056 (3)  |
| S2  | 0.0314 (4)   | 0.0447 (4)   | 0.0351 (4)   | -0.0005 (3)  | 0.0028 (3)   | -0.0062 (3)  |
| C1  | 0.0278 (14)  | 0.0412 (16)  | 0.0324 (14)  | 0.0039 (13)  | -0.0018 (11) | 0.0011 (12)  |
| N1  | 0.0358 (14)  | 0.0425 (14)  | 0.0379 (13)  | 0.0065 (11)  | 0.0065 (11)  | -0.0018 (11) |
| C2  | 0.0363 (17)  | 0.0508 (19)  | 0.0526 (19)  | 0.0000 (15)  | 0.0126 (15)  | -0.0015 (16) |
| C3  | 0.054 (2)    | 0.0486 (19)  | 0.052 (2)    | -0.0045 (17) | 0.0177 (16)  | 0.0041 (16)  |
| C4  | 0.053 (2)    | 0.0494 (19)  | 0.0441 (18)  | -0.0011 (16) | 0.0093 (16)  | 0.0058 (15)  |
| C5  | 0.061 (2)    | 0.054 (2)    | 0.0444 (19)  | -0.0065 (18) | 0.0107 (17)  | 0.0071 (16)  |
| C6  | 0.070 (2)    | 0.052 (2)    | 0.050 (2)    | -0.006 (2)   | 0.0055 (18)  | 0.0108 (17)  |
| C7  | 0.095 (3)    | 0.084 (3)    | 0.072 (3)    | 0.020 (3)    | 0.016 (2)    | 0.032 (2)    |
| C8  | 0.0443 (18)  | 0.0472 (18)  | 0.0323 (15)  | 0.0047 (15)  | 0.0052 (13)  | -0.0040 (14) |
| C9  | 0.0356 (16)  | 0.0461 (17)  | 0.0397 (17)  | 0.0020 (14)  | 0.0049 (13)  | -0.0003 (14) |
| C10 | 0.0411 (17)  | 0.0445 (18)  | 0.0361 (16)  | -0.0013 (14) | 0.0067 (13)  | -0.0013 (13) |

|      |             |             |             |              |              |              |
|------|-------------|-------------|-------------|--------------|--------------|--------------|
| C11  | 0.0426 (18) | 0.0433 (17) | 0.0424 (17) | -0.0016 (15) | 0.0061 (14)  | -0.0026 (14) |
| C12  | 0.063 (2)   | 0.0433 (19) | 0.0473 (19) | -0.0016 (17) | 0.0070 (17)  | -0.0035 (15) |
| C13  | 0.101 (3)   | 0.045 (2)   | 0.079 (3)   | 0.017 (2)    | 0.001 (3)    | -0.005 (2)   |
| S3   | 0.0348 (4)  | 0.0483 (4)  | 0.0324 (4)  | -0.0003 (3)  | 0.0024 (3)   | -0.0023 (3)  |
| S4   | 0.0338 (4)  | 0.0511 (4)  | 0.0326 (4)  | 0.0005 (3)   | 0.0013 (3)   | -0.0069 (3)  |
| C14  | 0.0296 (14) | 0.0548 (19) | 0.0250 (14) | 0.0053 (13)  | -0.0044 (11) | 0.0027 (13)  |
| N2   | 0.0318 (13) | 0.0549 (15) | 0.0257 (11) | 0.0034 (11)  | 0.0013 (10)  | 0.0002 (11)  |
| C15  | 0.0335 (16) | 0.060 (2)   | 0.0333 (15) | -0.0013 (15) | 0.0047 (13)  | -0.0002 (14) |
| C16  | 0.0388 (17) | 0.062 (2)   | 0.0391 (17) | 0.0057 (16)  | -0.0005 (14) | -0.0016 (15) |
| C17  | 0.0418 (17) | 0.0525 (19) | 0.0475 (18) | 0.0029 (16)  | -0.0070 (16) | -0.0049 (15) |
| C18  | 0.047 (2)   | 0.052 (2)   | 0.075 (2)   | 0.0121 (17)  | -0.0179 (18) | -0.0116 (19) |
| C19  | 0.056 (2)   | 0.079 (3)   | 0.085 (3)   | 0.005 (2)    | -0.018 (2)   | -0.013 (2)   |
| C20  | 0.090 (3)   | 0.069 (3)   | 0.106 (4)   | 0.002 (2)    | -0.038 (3)   | -0.019 (3)   |
| C21  | 0.0420 (18) | 0.063 (2)   | 0.0278 (14) | 0.0087 (16)  | 0.0063 (13)  | -0.0040 (14) |
| C22  | 0.048 (2)   | 0.057 (2)   | 0.0478 (19) | 0.0065 (17)  | 0.0008 (16)  | 0.0014 (16)  |
| C23  | 0.095 (3)   | 0.075 (3)   | 0.070 (3)   | 0.025 (3)    | 0.000 (2)    | -0.015 (2)   |
| C24  | 0.151 (6)   | 0.115 (6)   | 0.130 (8)   | 0.057 (5)    | -0.025 (6)   | -0.047 (5)   |
| C25  | 0.106 (5)   | 0.079 (5)   | 0.154 (8)   | 0.012 (4)    | -0.018 (5)   | 0.011 (5)    |
| C26  | 0.094 (5)   | 0.078 (5)   | 0.158 (9)   | 0.004 (4)    | 0.015 (5)    | 0.000 (5)    |
| C23' | 0.095 (3)   | 0.075 (3)   | 0.070 (3)   | 0.025 (3)    | 0.000 (2)    | -0.015 (2)   |

**Geometric parameters ( $\text{\AA}$ ,  $^\circ$ ) for  $[\text{Pd}(\text{S}_2\text{CN}^o\text{Hex}_2)_3] (3)$**

|         |            |           |            |
|---------|------------|-----------|------------|
| Pd1—S2  | 2.3143 (7) | C12—C13   | 1.509 (5)  |
| Pd1—S4  | 2.3236 (8) | S3—C14    | 1.720 (3)  |
| Pd1—S3  | 2.3241 (8) | S4—C14    | 1.724 (3)  |
| Pd1—S1  | 2.3272 (8) | C14—N2    | 1.317 (3)  |
| S1—C1   | 1.725 (3)  | N2—C15    | 1.471 (4)  |
| S2—C1   | 1.724 (3)  | N2—C21    | 1.478 (4)  |
| C1—N1   | 1.315 (3)  | C15—C16   | 1.526 (4)  |
| N1—C2   | 1.471 (4)  | C16—C17   | 1.505 (4)  |
| N1—C8   | 1.479 (4)  | C17—C18   | 1.541 (4)  |
| C2—C3   | 1.522 (4)  | C18—C19   | 1.488 (5)  |
| C3—C4   | 1.510 (4)  | C19—C20   | 1.520 (5)  |
| C4—C5   | 1.521 (4)  | C21—C22   | 1.505 (4)  |
| C5—C6   | 1.516 (5)  | C22—C23   | 1.521 (5)  |
| C6—C7   | 1.510 (5)  | C23—C24   | 1.534 (8)  |
| C8—C9   | 1.517 (4)  | C24—C25   | 1.315 (10) |
| C9—C10  | 1.524 (4)  | C25—C26   | 1.459 (8)  |
| C10—C11 | 1.514 (4)  | C24'—C25' | 1.330 (13) |

|            |             |                |             |
|------------|-------------|----------------|-------------|
| C11—C12    | 1.516 (4)   | C25'—C26'      | 1.463 (14)  |
| S2—Pd1—S4  | 176.69 (3)  | C10—C11—C12    | 113.6 (3)   |
| S2—Pd1—S3  | 104.06 (3)  | C13—C12—C11    | 112.6 (3)   |
| S4—Pd1—S3  | 75.62 (3)   | C14—S3—Pd1     | 86.26 (10)  |
| S2—Pd1—S1  | 75.68 (3)   | C14—S4—Pd1     | 86.18 (10)  |
| S4—Pd1—S1  | 104.51 (3)  | N2—C14—S3      | 124.7 (2)   |
| S3—Pd1—S1  | 177.72 (3)  | N2—C14—S4      | 123.6 (2)   |
| C1—S1—Pd1  | 86.21 (10)  | S3—C14—S4      | 111.66 (16) |
| C1—S2—Pd1  | 86.66 (10)  | C14—N2—C15     | 120.0 (3)   |
| N1—C1—S2   | 123.7 (2)   | C14—N2—C21     | 121.3 (3)   |
| N1—C1—S1   | 125.0 (2)   | C15—N2—C21     | 118.7 (2)   |
| S2—C1—S1   | 111.27 (16) | N2—C15—C16     | 112.4 (3)   |
| C1—N1—C2   | 122.5 (2)   | C17—C16—C15    | 111.6 (3)   |
| C1—N1—C8   | 120.5 (3)   | C16—C17—C18    | 113.2 (3)   |
| C2—N1—C8   | 116.9 (2)   | C19—C18—C17    | 113.1 (3)   |
| N1—C2—C3   | 113.6 (3)   | C18—C19—C20    | 113.5 (3)   |
| C4—C3—C2   | 114.9 (3)   | N2—C21—C22     | 114.6 (2)   |
| C3—C4—C5   | 113.2 (3)   | C21—C22—C23    | 110.3 (3)   |
| C6—C5—C4   | 114.1 (3)   | C22—C23—C24    | 110.3 (5)   |
| C7—C6—C5   | 113.1 (3)   | C25—C24—C23    | 119.3 (9)   |
| N1—C8—C9   | 112.5 (2)   | C24—C25—C26    | 124.0 (8)   |
| C8—C9—C10  | 111.8 (2)   | C24'—C25'—C26' | 130.7 (15)  |
| C11—C10—C9 | 113.7 (3)   |                |             |

Least-squares planes (x,y,z in crystal coordinates) and deviations from them

(\* indicates atom used to define plane)

$$7.6869 (0.0023) x - 9.5788 (0.0050) y + 16.2867 (0.0046) z = 9.9432 (0.0028)$$

\* -0.0103 (0.0004) S1  
 \* 0.0104 (0.0004) S2  
 \* -0.0103 (0.0004) S3  
 \* 0.0103 (0.0004) S4  
 -0.0565 (0.0004) Pd1

Rms deviation of fitted atoms = 0.0103



**Crystal data for [Pd(S<sub>2</sub>CNMeCy)<sub>2</sub>] (4)**

|                                                                 |                                                         |
|-----------------------------------------------------------------|---------------------------------------------------------|
| C <sub>16</sub> H <sub>28</sub> N <sub>2</sub> PdS <sub>4</sub> | $F(000) = 496$                                          |
| $M_r = 483.04$                                                  | $D_x = 1.591 \text{ Mg m}^{-3}$                         |
| Monoclinic, $P2_1/n$                                            | Mo $K\alpha$ radiation, $\lambda = 0.71073 \text{ \AA}$ |
| $a = 9.9199 (7) \text{ \AA}$                                    | Cell parameters from 3958 reflections                   |
| $b = 11.0292 (7) \text{ \AA}$                                   | $\theta = 2.9\text{--}31.5^\circ$                       |
| $c = 10.1444 (7) \text{ \AA}$                                   | $\mu = 1.34 \text{ mm}^{-1}$                            |
| $\beta = 114.696 (1)^\circ$                                     | $T = 150 \text{ K}$                                     |
| $V = 1008.37 (12) \text{ \AA}^3$                                | Block, yellow                                           |
| $Z = 2$                                                         | $0.28 \times 0.22 \times 0.20 \text{ mm}$               |

**Data collection**

|                                                                                     |                                                                        |
|-------------------------------------------------------------------------------------|------------------------------------------------------------------------|
| Bruker APEX 2 CCD diffractometer                                                    | 2767 reflections with $I > 2\sigma(I)$                                 |
| Radiation source: fine-focus sealed tube                                            | $R_{\text{int}} = 0.030$                                               |
| $\omega$ rotation with narrow frames scans                                          | $\theta_{\text{max}} = 31.8^\circ$ , $\theta_{\text{min}} = 2.4^\circ$ |
| Absorption correction: multi-scan<br><i>SADABS</i> v2009/1, Sheldrick, G.M., (2009) | $h = -14 \rightarrow 14$                                               |
| $T_{\text{min}} = 0.672$ , $T_{\text{max}} = 0.746$                                 | $k = -16 \rightarrow 15$                                               |
| 11825 measured reflections                                                          | $l = -14 \rightarrow 14$                                               |
| 3217 independent reflections                                                        |                                                                        |

**Refinement**

|                                 |                                                                                     |
|---------------------------------|-------------------------------------------------------------------------------------|
| Refinement on $F^2$             | 0 restraints                                                                        |
| Least-squares matrix: full      | Hydrogen site location: inferred from neighbouring sites                            |
| $R[F^2 > 2\sigma(F^2)] = 0.026$ | H-atom parameters constrained                                                       |
| $wR(F^2) = 0.065$               | $w = 1/[\sigma^2(F_o^2) + (0.0335P)^2 + 0.0751P]$<br>where $P = (F_o^2 + 2F_c^2)/3$ |
| $S = 1.06$                      | $(\Delta/\sigma)_{\text{max}} = 0.001$                                              |
| 3217 reflections                | $\Delta_{\text{max}} = 0.38 \text{ e \AA}^{-3}$                                     |
| 107 parameters                  | $\Delta_{\text{min}} = -0.86 \text{ e \AA}^{-3}$                                    |

**Special details**

*Geometry.* All esds (except the esd in the dihedral angle between two l.s. planes) are estimated using the full covariance matrix. The cell esds are taken into account individually in the estimation of esds in distances, angles and torsion angles; correlations between esds in cell parameters are only used when they are defined by crystal symmetry. An approximate (isotropic) treatment of cell esds is used for estimating esds involving l.s. planes.

*Fractional atomic coordinates and isotropic or equivalent isotropic displacement parameters (Å<sup>2</sup>)*

|     | <i>x</i>     | <i>y</i>     | <i>z</i>     | <i>U</i> <sub>iso</sub> */ <i>U</i> <sub>eq</sub> |
|-----|--------------|--------------|--------------|---------------------------------------------------|
| Pd1 | 1.0000       | 0.0000       | 1.0000       | 0.01690 (6)                                       |
| S1  | 0.87449 (4)  | 0.06787 (4)  | 0.76174 (5)  | 0.02241 (10)                                      |
| S2  | 0.75458 (5)  | 0.02191 (4)  | 0.96658 (5)  | 0.02183 (9)                                       |
| C1  | 0.71887 (17) | 0.07598 (14) | 0.79591 (17) | 0.0175 (3)                                        |
| N1  | 0.58869 (14) | 0.11999 (13) | 0.70459 (14) | 0.0184 (3)                                        |
| C2  | 0.57087 (19) | 0.17457 (17) | 0.56660 (18) | 0.0250 (4)                                        |
| H2A | 0.5154       | 0.1190       | 0.4869       | 0.038*                                            |
| H2B | 0.6688       | 0.1900       | 0.5681       | 0.038*                                            |
| H2C | 0.5166       | 0.2512       | 0.5525       | 0.038*                                            |
| C3  | 0.46457 (16) | 0.13096 (14) | 0.74922 (17) | 0.0175 (3)                                        |
| H3  | 0.4815       | 0.0699       | 0.8274       | 0.021*                                            |
| C5  | 0.34195 (18) | 0.26488 (17) | 0.86660 (19) | 0.0240 (3)                                        |
| H5A | 0.3402       | 0.3478       | 0.9031       | 0.029*                                            |
| H5B | 0.3632       | 0.2076       | 0.9480       | 0.029*                                            |
| C4  | 0.46427 (17) | 0.25616 (15) | 0.81312 (18) | 0.0205 (3)                                        |
| H4A | 0.5617       | 0.2713       | 0.8949       | 0.025*                                            |
| H4B | 0.4485       | 0.3189       | 0.7383       | 0.025*                                            |
| C6  | 0.19049 (19) | 0.23553 (16) | 0.7451 (2)   | 0.0247 (4)                                        |
| H6A | 0.1639       | 0.2984       | 0.6687       | 0.030*                                            |
| H6B | 0.1143       | 0.2362       | 0.7842       | 0.030*                                            |
| C7  | 0.19253 (17) | 0.11114 (16) | 0.67910 (18) | 0.0227 (3)                                        |
| H7A | 0.2085       | 0.0476       | 0.7531       | 0.027*                                            |
| H7B | 0.0951       | 0.0961       | 0.5973       | 0.027*                                            |
| C8  | 0.31471 (17) | 0.10276 (16) | 0.62472 (17) | 0.0211 (3)                                        |
| H8A | 0.3164       | 0.0202       | 0.5871       | 0.025*                                            |
| H8B | 0.2946       | 0.1612       | 0.5447       | 0.025*                                            |

*Atomic displacement parameters (Å<sup>2</sup>)*

|     | <i>U</i> <sup>11</sup> | <i>U</i> <sup>22</sup> | <i>U</i> <sup>33</sup> | <i>U</i> <sup>12</sup> | <i>U</i> <sup>13</sup> | <i>U</i> <sup>23</sup> |
|-----|------------------------|------------------------|------------------------|------------------------|------------------------|------------------------|
| Pd1 | 0.01242 (9)            | 0.01926 (10)           | 0.01711 (9)            | 0.00314 (6)            | 0.00427 (7)            | 0.00101 (6)            |
| S1  | 0.01504 (19)           | 0.0324 (2)             | 0.02016 (19)           | 0.00491 (16)           | 0.00771 (15)           | 0.00442 (16)           |
| S2  | 0.01503 (19)           | 0.0315 (2)             | 0.01824 (19)           | 0.00546 (15)           | 0.00627 (16)           | 0.00704 (16)           |
| C1  | 0.0150 (7)             | 0.0178 (7)             | 0.0182 (7)             | 0.0007 (6)             | 0.0055 (6)             | 0.0002 (6)             |
| N1  | 0.0148 (6)             | 0.0232 (7)             | 0.0180 (6)             | 0.0027 (5)             | 0.0076 (5)             | 0.0032 (5)             |
| C2  | 0.0228 (8)             | 0.0324 (9)             | 0.0211 (8)             | 0.0081 (7)             | 0.0103 (7)             | 0.0108 (7)             |
| C3  | 0.0137 (7)             | 0.0205 (8)             | 0.0175 (7)             | 0.0025 (6)             | 0.0056 (6)             | 0.0026 (6)             |

|    |            |            |            |             |            |             |
|----|------------|------------|------------|-------------|------------|-------------|
| C5 | 0.0220 (8) | 0.0257 (9) | 0.0254 (8) | -0.0009 (7) | 0.0110 (7) | -0.0036 (7) |
| C4 | 0.0158 (7) | 0.0231 (8) | 0.0217 (8) | -0.0019 (6) | 0.0071 (6) | -0.0031 (6) |
| C6 | 0.0168 (8) | 0.0287 (9) | 0.0303 (9) | 0.0028 (6)  | 0.0115 (7) | 0.0021 (7)  |
| C7 | 0.0140 (7) | 0.0299 (9) | 0.0225 (8) | -0.0018 (6) | 0.0058 (6) | 0.0018 (7)  |
| C8 | 0.0155 (7) | 0.0258 (8) | 0.0198 (7) | -0.0019 (6) | 0.0052 (6) | -0.0023 (6) |

**Geometric parameters ( $\text{\AA}$ ,  $^\circ$ ) for  $[\text{Pd}(\text{S}_2\text{CNMeCy})_2]$  (4)**

|                                        |              |          |             |
|----------------------------------------|--------------|----------|-------------|
| Pd1—S2                                 | 2.3261 (5)   | N1—C2    | 1.465 (2)   |
| Pd1—S2 <sup>i</sup>                    | 2.3261 (5)   | N1—C3    | 1.4837 (19) |
| Pd1—S1                                 | 2.3319 (4)   | C3—C4    | 1.526 (2)   |
| Pd1—S1 <sup>i</sup>                    | 2.3319 (4)   | C3—C8    | 1.527 (2)   |
| Pd1—H2C <sup>ii</sup>                  | 2.7872       | C5—C4    | 1.525 (2)   |
| S1—C1                                  | 1.7201 (16)  | C5—C6    | 1.528 (2)   |
| S2—C1                                  | 1.7223 (16)  | C6—C7    | 1.530 (2)   |
| C1—N1                                  | 1.3273 (19)  | C7—C8    | 1.530 (2)   |
|                                        |              |          |             |
| S2—Pd1—S2 <sup>i</sup>                 | 180.0        | N1—C1—S2 | 124.04 (12) |
| S2—Pd1—S1                              | 75.080 (14)  | S1—C1—S2 | 111.08 (9)  |
| S2 <sup>i</sup> —Pd1—S1                | 104.919 (14) | C1—N1—C2 | 120.73 (13) |
| S2—Pd1—S1 <sup>i</sup>                 | 104.919 (14) | C1—N1—C3 | 120.42 (13) |
| S2 <sup>i</sup> —Pd1—S1 <sup>i</sup>   | 75.081 (14)  | C2—N1—C3 | 118.28 (12) |
| S1—Pd1—S1 <sup>i</sup>                 | 180.00 (2)   | N1—C3—C4 | 110.65 (13) |
| S2—Pd1—H2C <sup>ii</sup>               | 84.3         | N1—C3—C8 | 112.10 (13) |
| S2 <sup>i</sup> —Pd1—H2C <sup>ii</sup> | 95.7         | C4—C3—C8 | 111.20 (13) |
| S1—Pd1—H2C <sup>ii</sup>               | 81.1         | C4—C5—C6 | 111.10 (14) |
| S1 <sup>i</sup> —Pd1—H2C <sup>ii</sup> | 98.9         | C5—C4—C3 | 110.57 (13) |
| C1—S1—Pd1                              | 86.75 (5)    | C5—C6—C7 | 110.77 (14) |
| C1—S2—Pd1                              | 86.88 (5)    | C8—C7—C6 | 111.66 (14) |
| N1—C1—S1                               | 124.87 (12)  | C3—C8—C7 | 109.48 (13) |

Symmetry codes: (i)  $-x+2, -y, -z+2$ ; (ii)  $x+1/2, -y+1/2, z+1/2$ .
